*Haplopappus platylepis* resin for pest control

1

2

3 **“*Haplopappus platylepis* (Asteraceae) resin: an adhesive trap for pest control of**  
4 **crawling arthropods, with antimicrobial potential”**

5

6 Cristian A. Villagra<sup>1\*</sup>¶, Verónica Macías-Marabolí<sup>1&</sup>, Constanza Schapheer<sup>2&</sup>, Jorge  
7 Bórquez <sup>3&</sup>, Mario J. Simirgiotis<sup>4&</sup>, Javier Echeverría<sup>5</sup>, Marcia González-Teuber<sup>5</sup>,  
8 Alejandro Urzúa<sup>5\*</sup>¶.

9 <sup>1</sup>Instituto de Entomología, Universidad Metropolitana de Ciencias de la Educación,  
10 Santiago, Chile.

11 <sup>2</sup> Laboratorio de Sistemática y Evolución de Plantas, Departamento de Silvicultura y  
12 Conservación de la Naturaleza, Universidad de Chile. Av. Santa Rosa 11315, La Pintana,  
13 Santiago, Chile

14 <sup>3</sup>Laboratorio de Productos Naturales, Departamento de Química, Facultad de Ciencias  
15 Básicas, Universidad de Antofagasta, Chile.

16 <sup>4</sup>Instituto de Farmacia, Facultad de Ciencias, Universidad Austral de Chile, Chile.

17 <sup>5</sup>Laboratorio de Química Ecológica, Facultad de Química y Biología, Universidad de  
18 Santiago de Chile, Chile.

19

20 \*Corresponding authors

21 cristian.villagra@umce.cl, alejandro.urzua@usach.cl

22 ¶ These authors are Joint Senior Authors

23 & These authors contributed equally to this work

*Haplopappus platylepis* resin for pest control

24

## 26 **Abstract**

27 The use of plant secondary metabolites has been incorporated as key part of integrated  
28 pest management and as an alternative to the use of pesticides. This may even be more  
29 relevant regarding domiciliary pest insects, capable of vectoring pathogens to humans. In  
30 these environments control its more difficult due to its possible effect on non-target  
31 organisms and human health. Here we evaluated the use of the resinous exudate of  
32 Chile's endemic bush *Haplopappus platylepis* (Asteraceae) as a sticky trap for crawling  
33 pest insects. We used *Blatta orientalis* Linneus (oriental cockroach), a cosmopolitan  
34 synanthropic pest, as test organism. We compared effectiveness on cockroach-trapping of  
35 *H. platylepis*' resin versus a commercially available sticky trap, and analyzed these two  
36 sticky substances using UHPLC-DAD-MS and GC-MS. We found that *H. platylepis*  
37 resin was as effective as the commercial adhesive on trapping *B. orientalis*. Plant  
38 resinous exudate was composed by a mixture of flavonoids, labdane diterpenoids and  
39 unsaturated fatty acids oxylipins, which are known for their antimicrobial and antioxidant  
40 properties. In contrast, the commercial sticky trap was rich in 1-bromohexadecane and 2-  
41 chlorocyclohexanol, which have been described as allergens and as potentially toxic to  
42 humans. Considering these findings, we suggest the use of the resinous extract of *H.*  
43 *platylepis* as an effective adhesive trapping method against pest cockroaches and possibly  
44 other crawling synanthropic arthropods cohabiting with humans. We highlight the  
45 importance of novel, non-toxic and eco-friendly products as strategies to be applied in the  
46 management of insect pests.

47 **Keywords:** synanthropic pest, integrated pest management, labdane terpenoids  
48 antimicrobial properties.

## 49 **Introduction**

50 Synthetic insecticides are controversial as they may represent a potential risk for human  
51 health and non-target organisms, beside its contribution to air and soil pollution [1–3].  
52 Furthermore, controlling effects on pests can be rapidly ameliorated due to the evolution  
53 of resistance on target organisms [4–6]. This is especially concerning in the case of  
54 synanthropic arthropods related to vector-borne and zoonotic diseases inhabiting  
55 household, food storage facilities and hospitals [7,8]. These pests are hard to control due  
56 to their proximity to human-used spaces, restricting even more the use of various  
57 chemical control methods [9,10].

58 This is the case of several crawling pest arthropods including arachnids such as ticks  
59 [11,12], and insects belonging to: Hemiptera, like bedbugs [13] and triatomines [14] and  
60 Blattodea: such as pest cockroaches [15,16]. Synanthropic cockroaches [17] such as  
61 *Periplaneta americana* (Blattidae), *Blattella germanica* (Ectobiidae) and *Blatta orientalis*  
62 (Blattidae) have evolved associated to human-modified environments and usually act as  
63 vectors of allergens and diverse pathogenous microorganisms responsible for human  
64 diseases [18–21]. Thus, these insects represent a serious threat for human health [22].

65  
66 The use of insecticides for the control of these insects has been extremely  
67 difficult, as cockroaches may become resistant to commonly-used chemical compounds  
68 [6]. Moreover, many insecticides at sublethal doses, are repellent to cockroaches and they  
69 are capable to avoid its contact [23]. In addition, some studies have shown that the use of  
70 pesticide against cockroach infestation paradoxically increases the level of the cockroach  
71 allergens Bla g 1 and Bla g 2, and possibly other allergens [24,25]. For example, adults of

*Haplopappus platylepis* resin for pest control

72 *B. germanica* exposed to sub-lethal doses of the pesticide boric acid increase the  
73 production of the major allergen of Bla g 2 [25], which can lead to significant health  
74 problems, including asthma, eczemas skin reactions and allergic rhinitis [26].  
75 Furthermore, it has been demonstrated the evolution of antibiotic resistance in pathogenic  
76 strains carried by *P. americana* and *B. germanica* collected from domiciliary and  
77 intensive care hospital facilities [27–30].

78 Therefore, in order to avoid the development of resistances either in the animal or  
79 their microbial counterparts, control strategies must combine the suppression of both  
80 crawling arthropod vectors and its associated pathogens. This approach must also  
81 consider current concerns on the safe use of pesticides for controlling difficult insect  
82 pests, especially regarding inhabited and food storing places [31,32]. In this work we  
83 studied the chemical composition of the resinous exudate of a Chilean endemic shrub  
84 *Haplopappus platylepis* Phil. (Asteraceae), focusing with particular interest on the  
85 presence of antimicrobial potential compounds. Coupled with this, we studied if adhesive  
86 extracts of this secretion can be used for the control of pest crawling arthropods, testing  
87 its adhesive function against the cosmopolitan pest cockroach *Blatta orientalis* Linnaeus,  
88 1758 (Blattodea: Blattidae).

89

90 The use of plant-derived substances, capable of repelling and/or killing  
91 synanthropic pests, has been shown in several studies as an effective alternative to  
92 insecticides [33–35]. Among these, plant resins have demonstrated to be effective not  
93 only against several arthropods [36], but also in the combat against pathogenic  
94 microorganisms [37,38]. Moreover, the use of sticky traps could represent a more

*Haplopappus platylepis* resin for pest control

95 restrictible pesticide format in comparison with air-borne product, where spray drift  
96 unwanted consequences on human health have been reported [39].

97 In addition, adhesive traps can be displayed in refuge areas where airborne products can  
98 not easily reach [40], and reduce pest insects mechanically by catching them [41].

99 Moreover, these collected insects allow pest density monitoring [42]. This latter is a  
100 guide during decision-making for the most appropriate control measurement [43].

101 Considering the above-mentioned information, adhesive plant secretions such as resinous  
102 extractions may arise as suitable candidate for safe pest control of house pest and  
103 zoonotic vector insect [44].

104 *Haplopappus platylepis*, also known as “Devil’s Lollipop”, produces an adhesive  
105 resinous secretion covering its leaves and forming a natural sticky trap over floral buds  
106 [45]. This plant belongs to an asteraceous lineage presenting copious resin production  
107 with known antibacterial and antifungal properties, widely distributed in north and central  
108 Chile [38,46–48]. Previously, under field conditions, we showed that *H. platylepis*’ sticky  
109 exudate was capable of trapping several groups of insects that were fatally adhered  
110 during its blooming season [45]. In this study, we evaluated the potential use of *H.*  
111 *platylepis* inflorescence’s sticky exudate as an alternative adhesive trap for pest crawling  
112 insects. For these propose we tested it, in laboratory bioassays, on a common global  
113 household pest: the oriental cockroach *B. orientalis*. We compared its effectiveness on  
114 adhering pest cockroaches in relation to a commercial adhesive trap (Eco-opción®). In  
115 addition, we analyzed and compared the chemical composition of the sticky exudate of  
116 *H. platylepis* and the commercial adhesive trap using UHPLC-DAD-MS (ultra-high-  
117 performance liquid chromatography-diode array detector- mass spectrometry) and GC-

*Haplopappus platylepis* resin for pest control

118 MS (gas chromatography-mass spectrometry). Finally, we reviewed for bioactivity of  
119 compounds detected in both natural and commercial adhesives, in order to assess both  
120 their potential toxicity and harmful effects for humans, as well as any additional  
121 biological properties, especially focusing against pathogenic microorganisms.

122

## 123 **Materials and methods**

### 124 **Plant material and trap extractions**

125 Plant specimens of *Haplopappus platylepis* Phil. (Asteraceae) were determined following  
126 Klingenberg's monography for *Haplopappus* genus [49]. Floral buds of devil's lollypop  
127 were collected during March 2016 at Los Molles, Provincia de Petorca, V Region de  
128 Valparaíso, Chile (32°14'07.0"S71°31'24"W) and at Punta Hueso, Pichidanguí, Provincia  
129 de Choapa, IV Region de Coquimbo, Chile (32°10'27"S 71°31'21"W). Samples were  
130 preserved until analysis at -10° C. Voucher specimens (SGO 166498) were deposited in  
131 the Herbarium of the "Museo Nacional de Historia Natural" (MCCN), Santiago, Chile.

132 The sticky exudate of *H. platylepis* was obtained by dipping fresh plant material (300  
133 g) in cold CH<sub>2</sub>Cl<sub>2</sub> (8 L) for 48 h, following Urzúa 2004's method[50]. The resulting  
134 extract was filtered through a cotton layer and concentrated to a sticky residue (36 g,  
135 12%) Commercial adhesive trap used was Eco-Opción® (Anasac Corporation, Santiago,  
136 Chile), sticky trap offered for the control of cursorial domiciliary pest such as ants,  
137 cockroaches and spiders. Each unit brings four 29.6x23.3 cm cardboard sticky traps with  
138 a total adhesive surface of 11x13 cm. The adhesive mixture from the cardboard was  
139 removed with a spatula and followed above-mentioned procedure for extraction. Extracts

*Haplopappus platylepis* resin for pest control

140 of both natural (*H. platylepis* inflorescence's resin) and commercial sticky traps were  
141 kept under 4°C for further chemical analyses (see below).

142

## 143 Insects

144 Oriental cockroaches used in this work were obtained from a population maintained in  
145 our laboratory since year 2014. Further specimens used for this study were collected  
146 from locations in San Miguel, Santiago, Metropolitan Region, Chile (33°29'54"S  
147 70°38'42"W). For taxonomic identification a general key for cosmopolitan and pest  
148 cockroaches present in Chile was used [51]. Insects were kept in captivity under  
149 laboratory conditions (20°-25°C and 40%-50% humidity) in 120x50x15 cm plastic  
150 rearing boxes, fed with dog food (MasterDog Adult ®) and water *ad libitum*, at Instituto  
151 de Entomología, UMCE. *Blatta orientalis* from both sexes were used for sticky-trapping  
152 bioassays (with body lengths among 5 to 25 mm, measured dorsally from head to last  
153 abdominal segments).

154

## 155 Trapping bioassays

156 Two treatments and one control were defined for the experiment. Treatments  
157 corresponded to cardboard surfaces (40x13cm) painted either with *H. platylepis* resinous  
158 exudate or with the commercial trap's adhesive. For control, a cardboard surface  
159 (40x13cm) with no adhesive mixture added was used. Each of these options was  
160 presented individually in the experimental arena. For this, the cardboard section was  
161 placed in the center of the horizontal space inside the arena, fixing its position with  
162 double-contact tape (Fig. 1). For each replicate 10 individuals from different sizes



*Haplopappus platylepis* resin for pest control

163 (measured as explained above) were placed in the experimental arena habituation area  
164 (Fig. 1), a subdivision of the box from where insect were released without contact them  
165 directly. For each trial we lifted the opening section of the habituation area and gave light  
166 pulses (10s) during three instances of the experiment: 0, 180 and 360s. At each of these  
167 pulses cockroaches tended to leave the habituation area and run to the other extreme of  
168 the box crossing the cardboard section. Total time of each test was 6min. After this  
169 period, for each treatment and control the number of individuals found attached to the  
170 cardboard was counted. Trapped insects were ultimately sacrificed by applying cold  
171 temperature (-10 °C). For each of these alternatives we repeated this test 10 times. Before  
172 using the experimental arena for each trial, this was cleaned with ethanol (95%), distilled  
173 water and dried in order to remove any chemical cue. The response variable was the  
174 proportion of insects trapped in each trial for each treatment. As data did not meet the  
175 criterion of normality distribution (Hammer, 1999), it was analyzed with a non-  
176 parametric analysis of variance Kruskal-Wallis followed by *post hoc* Mann Whitney test.  
177 In order to determine if *H. platylepis* inflorescence's resin and the commercial sticky trap  
178 are equally efficient trapping cockroaches of different sizes (seven ranges: from 5 to 7; 8  
179 to 10; 11 to 13; 14 to 16; 17 a 19; 20 to 22 and 23 to 25mm), insect proportion per range,  
180 captured in both traps, was compared. This was analyzed by using a Chi square test for  
181 two proportions [53]. All analyses were done with the PAST Paleontological Statistic,  
182 version 3.15.

183

184 **Fig. 1. Bioassay setup A.** Experimental arena: a. Background pattern. b. Treatment Area,  
185 c. Darkened walls, d: Hatch e: Habituation cubicle. f: Arena's door. **B.** Sticky trap made

*Haplopappus platylepis* resin for pest control

- 186 with *H. platylepis* resin (upper picture) and Eco-opción® adhesive (lower picture).
- 187 Trapped roaches are highlighted with arrows.

## 189 Chemicals

190 UHPLC-MS solvents, LC-MS formic acid and reagent grade chloroform were from  
191 Merck (Santiago, Chile). Ultrapure water was obtained from a Millipore water  
192 purification system (Milli-Q Merck Millipore, Chile). HPLC standards, (kaempferol,  
193 quercetin, isorhamnetin, eriodictyol, luteolin, apigenin, naringenin, all standards with  
194 purity higher than 95 % by HPLC) were purchased either from Sigma Aldrich (Saint  
195 Louis, Mo, USA), ChromaDex (Santa Ana, CA, USA), or Extrasynthèse (Genay,  
196 France).

197

## 198 UHPLC-DAD-MS analyses

199 Chemical resinous components were analyzed by using ultra-high-performance liquid  
200 chromatography-diode array detector-tandem mass spectrometry (UHPLC-DAD-MS).  
201 UHPLC-DAD-MS analysis was performed using a Thermo Scientific Dionex Ultimate  
202 3000 UHPLC system hyphenated with a Thermo Q exactive focus machine as it was  
203 reported by Simirgiotis et al. (2016). 5 mg of the resinous exudate were dissolved in 2  
204 mL of methanol and filtered with a PTFE filter for a final injection of 10  $\mu$ L into the  
205 instrument. Measurements were done as previously reported by Simirgiotis et al. (2016).  
206 The generation of molecular formulas was performed using high resolution accurate mass  
207 analysis (HRAM) and matching with the isotopic pattern. Lastly, analyses were  
208 confirmed using MS/MS data and comparing the fragments found with the literature.

209

## 210 LC and MS parameters

*Haplopappus platylepis* resin for pest control

211 Liquid chromatography was performed using an UHPLC C18 column (Acclaim, 150 mm  
212 × 4.6 mm ID, 2.5 μm, Thermo Fisher Scientific, Bremen, Germany) operated at 25 °C.  
213 The detection wavelengths were 254, 280, 330 and 354 nm, and DAD was recorded from  
214 200 to 800 nm for peak characterization. Mobile phases were 1 % formic aqueous  
215 solution (A) and acetonitrile (B). The gradient program time (min, % B) was: (0.00, 5);  
216 (5.00, 5); (10.00, 30); (15.00, 30); (20.00, 70); (25.00, 70); (35.00, 5) and 12 minutes for  
217 column equilibration before each injection. The flow rate was 1.00 mL min<sup>-1</sup>, and the  
218 injection volume was 10 μL. Standards and the resin extract dissolved in methanol were  
219 kept at 10°C during storage in the autosampler. The HESI II and Orbitrap spectrometer  
220 parameters were optimized as previously reported [54].

221

## 222 GC-MS analyses

223 Chemical composition of the commercial adhesive trap was analyzed by gas  
224 chromatography-mass spectrometry (GC-MS). GC-MS analysis was performed using a  
225 Thermo Scientific Trace GC Ultra linked to an ISQ quadrupole mass spectrometric  
226 detector with an integrated data system (Xcalibur 2.0, Thermo Fisher Scientific Inc.,  
227 Waltham, MA, USA), equipped with a capillary column (Rtx-5 MS, film thickness 0.25  
228 μm, 60 x 0.25 mm, Restek Corporation, Bellefonte, PA, USA) The operating conditions  
229 were as follows: on-column injection; injector temperature, 250 °C; detector temperature,  
230 280 °C; carrier gas, He at 1.25 mL/min; oven temperature program: 40 °C increase to 260  
231 °C at 4 °C/min, and then 260 °C for 5 min. The mass spectra were obtained at an  
232 ionization voltage of 70 eV. Recording conditions employed a scan time of 1.5 s and a  
233 mass range of 40 to 400 amu. The identification of compounds in the chromatographic

234 profiles was achieved by comparison of their mass spectra with a library database  
235 (NIST08, NIST, Gaithersburg, MD, USA) and by comparison of their calculated  
236 retention indices with those reported in the literature [55] for the same type of column.

237

## 238 **Results**

### 239 **Trapping bioassays**

240 The proportion of insects found over the cardboards was statistically different among  
241 treatments ( $H(X^2) = 19.43$ ,  $p < 0.001$ , Kruskal-Wallis, Fig. 2A). *H. platylepis*  
242 inflorescence's sticky exudate and the commercial sticky trap differed with statistical  
243 significance from control clean cardboard (in both cases: U Mann-Whitney pairwise,  $p <$   
244  $0.001$ ). However, no differences were found in post hoc test for the total number of  
245 insects attached on cardboards between the *H. platylepis*' resin and the commercial sticky  
246 trap (U Mann-Whitney pairwise,  $p = 0.691$ ). When the proportion of cockroaches trapped  
247 by *H. platylepis*' sticky exudate and by the commercial sticky trap for each size range  
248 was compared, no statistical differences were found between natural and commercial  
249 sticky traps ( $X^2 = 1.57$ ,  $p = 0.211$ ) (Fig. 2B).

250

251 **Fig. 2. Cockroach adhesion results.** A. Mean and 1SE for the proportion of *B. orientalis*  
252 found over the cardboard (Y axis) painted with: *H. platylepis* resin (green), Eco-opción®  
253 commercial adhesive (red) and control (clean cardboard, black) obtained from 10  
254 replicates each (X axis). Different letters correspond to statistical differences after post  
255 hoc test at  $p < 0,05$ . B. Proportion of cockroaches trapped (Y axis) by either *H. platylepis*  
256 resin (light grey) or Eco-opción® commercial adhesive (dark grey) for each insect size

257 range (X axis). No statistical differences were found for each pair compared.

258

259

260

261

## 262 Chemical analyses

263 The data-dependent scan experiment was very useful for the identification of unknown  
264 compounds since it provides high resolution and accurate mass product ion spectra from  
265 precursor ions that are unknown beforehand within a single run. Combining data-  
266 dependent scans and MS<sup>n</sup> experiments, phytochemicals were tentatively identified in *H.*  
267 *platylepis* including simple phenolic acids flavones, flavanones, fatty acids, and labdane  
268 diterpenoids. UHPLC Q-orbitrap mass spectrometry analysis of *H. platylepis* sticky  
269 exudate showed the presence of twenty seven metabolites in the chromatograms (Fig. 3)  
270 including: 7 flavonoids (peaks **5, 6, 8-10, 15** and **16**), 3 phenolic acids (peaks **1-3**), 8 fatty  
271 acids (Peaks **4, 7, 13, 14, 18, 21, 22** and **25**), and 9 labdane terpenoids (peaks **11, 12, 17,**  
272 **19,20, 23, 24, 26,** and **27**). The detailed identification is explained below (Table 1, Figs. 4  
273 and 1S).

274 **Fig. 3: UHPLC chromatograms** A. TIC (total ion current, negative mode) and B. UV at  
275 280 nm, of *H. platylepis* resin.

276 **Fig. 4: Proposed biogenetic relationships between labdane diterpenoids.**

277

*Haplopappus platylepis* resin for pest control

278 **Table 1:** High resolution UHPLC PDA-Q-orbitrap identification of metabolites in

279 *Haplopappus platylepis* resin.

| Peak # | Retention time (min) | UV max (nm) | Tentative identification                        | Elemental composition [M-H]                                 | Theoretical mass (m/z) | Measured mass (m/z) | Accuracy (δppm) | MS <sup>n</sup> ions (δppm)                                                                                                                |
|--------|----------------------|-------------|-------------------------------------------------|-------------------------------------------------------------|------------------------|---------------------|-----------------|--------------------------------------------------------------------------------------------------------------------------------------------|
| 1      | 11.43                | -           | 12-Hydroxyjasmonate                             | C <sub>12</sub> H <sub>17</sub> O <sub>4</sub> <sup>-</sup> | 225.11276              | 225.11313           | 4.27            |                                                                                                                                            |
| 2      | 12.93                | -           | Dihydroxyphaseic acid                           | C <sub>15</sub> H <sub>21</sub> O <sub>5</sub> <sup>-</sup> | 281.13953              | 281.13945           | -0.28           |                                                                                                                                            |
| 3      | 13.71                | 325         | Ferulic acid                                    | C <sub>10</sub> H <sub>9</sub> O <sub>4</sub> <sup>-</sup>  | 193.05063              | 193.05040           | -1.19           |                                                                                                                                            |
| 4      | 18.76                | 285         | Trihydroxyoctadecaenoic acid                    | C <sub>18</sub> H <sub>33</sub> O <sub>5</sub> <sup>-</sup> | 329.23335              | 329.23367           | 0.97            |                                                                                                                                            |
| 5      | 19.05                | 255, 354    | 7,3'-dimethoxyquercetin                         | C <sub>17</sub> H <sub>13</sub> O <sub>7</sub> <sup>-</sup> | 329.06668              | 329.06702           | 1.03            |                                                                                                                                            |
| 6      | 19.26                | 287         | Hesperetin                                      | C <sub>16</sub> H <sub>13</sub> O <sub>6</sub> <sup>-</sup> | 301.07176              | 301.07199           | 0.76            | 160.84154,<br>135.04446                                                                                                                    |
| 7      | 19.38                | 285         | Trihydroxyoctadecadienoic acid                  | C <sub>18</sub> H <sub>31</sub> O <sub>5</sub> <sup>-</sup> | 327.21770              | 327.21799           | 0.89            |                                                                                                                                            |
| 8      | 19.56                | 287         | 5,3',5'-trihydroxy-3,7,4'-trimethoxyflavanone   | C <sub>17</sub> H <sub>15</sub> O <sub>7</sub> <sup>-</sup> | 331.08261              | 331.08233           | 1.22            |                                                                                                                                            |
| 9      | 20.02                | 255-354     | 5,3'-dihydroxy-3,7,4'-trimethoxyflavone         | C <sub>18</sub> H <sub>15</sub> O <sub>8</sub> <sup>-</sup> | 343.08233              | 343.08267           | 1.25            | 313.03580<br>(C <sub>16</sub> H <sub>9</sub> O <sub>7</sub> <sup>-</sup> ,<br>[M-OCH <sub>3</sub> -CH <sub>3</sub> ])                      |
| 10     | 20.04                | 255-354     | 7, 3', 5'-trimethoxymyricetin                   | C <sub>18</sub> H <sub>15</sub> O <sub>8</sub> <sup>-</sup> | 359.07724              | 359.07748           | 0.58            | 285.04031<br>(C <sub>15</sub> H <sub>9</sub> O <sub>6</sub> <sup>-</sup> ,<br>kaempferol)                                                  |
| 11     | 20.07                | 289         | Dehydropinifolic acid                           | C <sub>20</sub> H <sub>33</sub> O <sub>4</sub> <sup>-</sup> | 337.23843              | 337.23886           | 1.28            |                                                                                                                                            |
| 12     | 20.10                | 289         | Pinifolic acid (labd-8(20)-en-15,18-dioic acid) | C <sub>20</sub> H <sub>31</sub> O <sub>4</sub> <sup>-</sup> | 335.22278              | 335.22287           | 0.98            |                                                                                                                                            |
| 13     | 21.13                | 305         | Trihydroxyheneicosahexaenoic acid               | C <sub>21</sub> H <sub>29</sub> O <sub>5</sub> <sup>-</sup> | 361.20205              | 361.20242           | 1.02            |                                                                                                                                            |
| 14     | 21.36                | 303         | dihydroxyeicosapentaenoic acid                  | C <sub>20</sub> H <sub>29</sub> O <sub>4</sub> <sup>-</sup> | 333.20713              | 333.20740           | 0.90            | 273.18622<br>(C <sub>18</sub> H <sub>25</sub> O <sub>2</sub> <sup>-</sup> );<br>[M <sup>-</sup> - (CO <sub>2</sub> - CH <sub>3</sub> - H)] |
| 15     | 21.71                | 255-354     | 3,7-dimethoxyquercetin                          | C <sub>17</sub> H <sub>13</sub> O <sub>7</sub> <sup>-</sup> | 329.06668              | 329.06705           | 1.12            |                                                                                                                                            |
| 16     | 21.96                | 255-354     | 3,5, dihydroxy-3',4',7'-trimethoxyflavone       | C <sub>18</sub> H <sub>15</sub> O <sub>8</sub> <sup>-</sup> | 343.08233              | 343.08273           | 1.17            | 313.03467<br>(C <sub>16</sub> H <sub>9</sub> O <sub>7</sub> <sup>-</sup> ,<br>(M <sup>-</sup> -OCH <sub>3</sub> - CH <sub>3</sub> ))       |

*Haplopappus platylepis* resin for pest control

|    |       |     |                                           |                                                             |           |           |      |                                                                                                                                                                                                    |
|----|-------|-----|-------------------------------------------|-------------------------------------------------------------|-----------|-----------|------|----------------------------------------------------------------------------------------------------------------------------------------------------------------------------------------------------|
| 17 | 22.12 | -   | (epi) Pinifolic acid                      | C <sub>20</sub> H <sub>31</sub> O <sub>4</sub> <sup>-</sup> | 335.22278 | 335.22287 | 0.54 | 317.21219<br>(C <sub>20</sub> H <sub>29</sub> O <sub>3</sub> <sup>-</sup> ;<br>[M <sup>-</sup> - H <sub>2</sub> O];<br>273.18652<br>(C <sub>18</sub> H <sub>25</sub> O <sub>2</sub> <sup>-</sup> ) |
| 18 | 22.87 | 302 | Tetrahydroxytetraecohexaenoic acid        | C <sub>24</sub> H <sub>35</sub> O <sub>6</sub> <sup>-</sup> | 419.24423 | 419.24391 | 3.37 | 319.22806                                                                                                                                                                                          |
| 19 | 22.92 | 289 | 18-hydroxy-8(17)en-15-labdanoic acid      | C <sub>20</sub> H <sub>33</sub> O <sub>3</sub> <sup>-</sup> | 321.24377 | 321.24377 | 0.00 |                                                                                                                                                                                                    |
| 20 | 23.94 | 289 | Dehydropinifolic acid isomer              | C <sub>20</sub> H <sub>33</sub> O <sub>4</sub> <sup>-</sup> | 337.23843 | 337.23886 | 1.28 |                                                                                                                                                                                                    |
| 21 | 24.25 | 308 | Hydroxyeicosapentaenoic acid              | C <sub>20</sub> H <sub>29</sub> O <sub>3</sub> <sup>-</sup> | 317.21222 | 317.21255 | 1.04 |                                                                                                                                                                                                    |
| 22 | 22.87 | 303 | Hydroxyeicosatetraenoic acid              | C <sub>20</sub> H <sub>31</sub> O <sub>3</sub> <sup>-</sup> | 319.22787 | 319.22821 | 1.07 |                                                                                                                                                                                                    |
| 23 | 25.40 | 289 | 13-en-Pinifolic acid methyl ester         | C <sub>21</sub> H <sub>31</sub> O <sub>4</sub> <sup>-</sup> | 347.22278 | 347.22311 | 1.04 | 273.18616<br>(C <sub>18</sub> H <sub>25</sub> O <sub>2</sub> <sup>-</sup> );<br>239.26134<br>(C <sub>16</sub> H <sub>31</sub> O <sup>-</sup> )                                                     |
| 24 | 25.78 | 289 | Pinifolic acid methyl ester               | C <sub>21</sub> H <sub>33</sub> O <sub>4</sub> <sup>-</sup> | 349.23843 | 349.23880 | 1.06 |                                                                                                                                                                                                    |
| 25 | 25.88 | 306 | Trihydroxydocosaheptaenoic acid           | C <sub>22</sub> H <sub>31</sub> O <sub>5</sub> <sup>-</sup> | 375.21770 | 375.21823 | 1.41 |                                                                                                                                                                                                    |
| 26 | 25.99 | 289 | 18-acetyl-13,8 (17)dien-15-labdanoic acid | C <sub>22</sub> H <sub>33</sub> O <sub>4</sub> <sup>-</sup> | 361.23843 | 361.23877 | 0.94 |                                                                                                                                                                                                    |
| 27 | 26.56 | 289 | 18-acetyl-8(17)en-15-labdanoic acid       | C <sub>22</sub> H <sub>35</sub> O <sub>4</sub> <sup>-</sup> | 363.25408 | 363.25443 | 1.13 | 321.24319<br>(C <sub>18</sub> H <sub>25</sub> O <sub>2</sub> <sup>-</sup> ;<br>M <sup>-</sup> - H <sub>2</sub> O)                                                                                  |

280

## 281 Flavonoids

282 Peak **15** with a [M-H]<sup>-</sup> ion at *m/z* 329.06705 was identified 3,7-dimethoxyquercetin  
 283 (C<sub>17</sub>H<sub>13</sub>O<sub>7</sub><sup>-</sup>) and peak **5** with an ion at *m/z* 329.06702 as its isomer: 7,3'-  
 284 dimethoxyquercetin (Table 1). Peak **9** with a [M-H]<sup>-</sup> ion at *m/z* 343.08276 was identified  
 285 as the trimethoxylated flavonoid 5,3'-dihydroxy-3,7,4'-trimethoxyflavone (C<sub>18</sub>H<sub>15</sub>O<sub>8</sub><sup>-</sup>),  
 286 while peak **10** with a [M-H]<sup>-</sup> ion at *m/z* 359.07745 as 7,3',5'-trimethoxymyricetin  
 287 (C<sub>18</sub>H<sub>15</sub>O<sub>8</sub><sup>-</sup>). Peak **16** with a pseudomolecular ion at *m/z* 343.08273 was identified as 3,5-  
 288 dihydroxy-3',4',7-trimethoxyflavone (C<sub>18</sub>H<sub>15</sub>O<sub>8</sub><sup>-</sup>). The flavanone hesperetin, peak **6**, have



*Haplopappus platylepis* resin for pest control

289 been previously reported as main component in extracts of several *Nolana* species by  
290 some of us (Simirgiotis, et al., 2015) and its HR-MS ( $C_{16}H_{13}O_6^-$ ) and UV data matched  
291 the one obtained in our chromatograms ( $m/z$ : 301.07176). Another flavanone, peak **8** with  
292 a  $[M-H]^-$  ion at  $m/z$  331.08261 was identified as 5,3',5'-trihydroxy-3,7,4'-  
293 trimethoxyflavanone ( $C_{17}H_{15}O_7^-$ ).

294

## 295 Phenolic acids

296 The examination of the chromatograms revealed the presence of 3 phenolic acids:  
297 dihydroxyphaseic acid (peak **2**, ion at  $m/z$  281.13945,  $C_{15}H_{21}O_5^-$ ) [56], ferulic acid (peak  
298 **1**,  $m/z$  193.05040) and 12-hydroxy jasmonate (peak **3**,  $m/z$  225.11313) [57].

299

## 300 Fatty acids

301 Several peaks were tentatively identified as the dietary antioxidant polyhydroxylated  
302 unsaturated fatty acids known as oxylipins [58,59], antioxidant fatty acids. Peak **4** with a  
303  $[M-H]^-$  ion at  $m/z$  329.23367 was identified as trihydroxy-octadecenoic acid ( $C_{18}H_{33}O_5^-$ ),  
304 and peak **7** as its diene derivative ( $C_{18}H_{31}O_5^-$ ), as previously reported by some of us from  
305 Keule fruits [59]. Peak **13** with a pseudomolecular ion at  $m/z$  361.20242 was identified as  
306 trihydroxyheneicosahexaenoic acid ( $C_{21}H_{29}O_5^-$ ). Peak **14** with a  $[M-H]^-$  ion at  $m/z$   
307 333.20743 was identified as a dihydroxyeicosapentaenoic acid ( $C_{20}H_{29}O_4^-$ ) while peak **18**  
308 with a  $[M-H]^-$  ion at  $m/z$  419.24391 was identified as dihydroxytetracosatrienoic acid  
309 ( $C_{24}H_{35}O_6^-$ ) [58]. Peak **21** and **22** were identified as hydroxyeicosapentaenoic acid and  
310 hydroxyeicosatetraenoic acid ( $C_{20}H_{29}O_3^-$ ) and ( $C_{20}H_{31}O_3^-$ ), respectively. Finally, peak **25**

*Haplopappus platylepis* resin for pest control

311 with a [M-H]<sup>-</sup> ion at  $m/z$  375.21823 was identified as trihydroxydocosaheptaenoic acid  
312 (C<sub>22</sub>H<sub>31</sub>O<sub>5</sub><sup>-</sup>).

313

314 Labdane terpenoids

315 Labdane terpenoids corresponded to derivatives of pinifolic acid (labd-8(20)-en-15,18-  
316 dioic acid, peak **12**, C<sub>20</sub>H<sub>36</sub>O<sub>3</sub>) [60] most of them reported for the first time in this  
317 species. Thus, peak **11** with a [M-H]<sup>-</sup> ion at  $m/z$  337.23886 was identified as its  
318 hydrogenated derivative of dehydropinifolic acid (C<sub>20</sub>H<sub>33</sub>O<sub>4</sub><sup>-</sup>) and peak **17** with a [M-H]<sup>-</sup>  
319 ion at  $m/z$  335.22296 as an isomer of pinifolic acid (C<sub>20</sub>H<sub>31</sub>O<sub>4</sub><sup>-</sup>), probably the epimer at C-  
320 4 of the latter. Peak **24** was identified as pinifolic acid methyl ester (C<sub>21</sub>H<sub>33</sub>O<sub>4</sub><sup>-</sup>) and peak  
321 **23** as its derivative 13-en-pinifolic acid methyl ester (C<sub>21</sub>H<sub>31</sub>O<sub>4</sub><sup>-</sup>). Peak **20** with a [M-H]<sup>-</sup>  
322 ion at  $m/z$  337,23886 was identified as pinifolic acid derivative (C<sub>20</sub>H<sub>33</sub>O<sub>4</sub><sup>-</sup>). Three  
323 compounds were identified as labdanoic acid derivatives [61]. Thus, peak **19** with a [M-  
324 H]<sup>-</sup> ion at  $m/z$  321.24377 was identified as 18-hydroxy-8(17)en-15-labdanoic acid  
325 (C<sub>20</sub>H<sub>33</sub>O<sub>3</sub><sup>-</sup>), Peak **27** with a [M-H]<sup>-</sup> ion at  $m/z$  363.25449 was identified as 18-acetyl-  
326 8(17)en-15-labdanoic acid (C<sub>22</sub>H<sub>35</sub>O<sub>4</sub><sup>-</sup>) and peak **26** as its diene derivative (C<sub>22</sub>H<sub>33</sub>O<sub>4</sub><sup>-</sup>)  
327 (Fig. 4).

328

329 Components identified in the commercial sticky trap

330 GC-MS identified only two compound in the commercial sticky trap as: 1-  
331 bromohexadecane and 2-chlorocyclohexanol.

332

333 **Discussion**

334 The aim of this study was to compare the effectiveness of a natural sticky trap against a  
335 commercial one in capturing cockroaches by adhesion. In addition, the chemical  
336 composition of both traps was analyzed in order to estimate potential harmful effects for  
337 humans as well as potential antimicrobial chemical compounds. Our results provide  
338 evidence that the natural sticky trap of *H. platylepis* was as effective as the commercial  
339 one on trapping pest cockroaches. Considerable differences, however, were found in the  
340 chemical composition between the natural and the commercial trap. Whereas the former  
341 was rich in plant-derived antimicrobial compounds, the latter was rich in halogenated  
342 compounds, whose potential toxic effects for humans have been previously reported.

343 The *H. platylepis* sticky exudate seems to offer multiple benefits in relation to its  
344 use for controlling synanthropic pest crawling insect, such as cockroaches. First, because  
345 of its stickiness, it resulted as effective as the commercial trap for capturing cursorial  
346 insects, and second, due to its chemical composition rich in antibacterial compounds [62],  
347 it shows a further potential for controlling pest arthropod-borne transmitted pathogens.  
348 As far as we know, most of the compounds identified for *H. platylepis* resin are reported  
349 for the first time in this species. Antibacterial properties of *H. platylepis* sticky exudate  
350 can be associated with the phytochemical families detected in the mixture [62]. For  
351 instance, flavonoids have shown a wide-spectrum of inhibitory activity against a variety  
352 of human pathogens, including antibiotic-resistant Gram-positive and Gram-negative  
353 bacteria, viruses and fungus [62–66]. Labdane diterpenoids are also well known as  
354 antimicrobials [67,68]. It has been proved that the presence of a carboxylic acid in the C-  
355 15 position, which acted as a hydrogen-bond donor (HBD), is essential for the  
356 antibacterial activity of *ent*-labdanes [64]. Furthermore, derivatives of pinifolic acid,

*Haplopappus platylepis* resin for pest control

357 which were characterized in the *H. platylepis* sticky exudate, showed this main structural  
358 characteristic of labdanes. In addition, pinifolic acid has been previously reported as an  
359 effective compound in the treatment of leishmaniasis [69], a global insect-borne disease  
360 related to trypanosomes [70]. Long-chain polyunsaturated fatty acids, which were also  
361 abundant in *H. platylepis* resin, including oxylipins, have been widely tested for its  
362 antimicrobial activity [71–75]. Therefore, further functions of chemical compounds  
363 found in *H. platylepis*' resinous exudate expand the potential value of this plant-derived  
364 adhesive to act as a control against various vectoring-disease scenarios.

365         Synanthropic crawling arthropods are usual carriers of several human pathogens  
366 [76]. In the case of *B. orientalis*, it has been described to bear several human pathogenic  
367 bacteria genera such as *Mycobacteria*, *Klebsiella*, *Staphylococcus*, *Escherichia* and  
368 *Enterobacter* [77,78]. Therefore, the occurrence of compounds with anti-microbial  
369 functions in the sticky exudate of *H. platylepis* may synergistically contribute as an  
370 integrative pest control method, not only directly affecting the insect pests but also its  
371 associated pathogenic microorganisms. The commercial sticky trap, in contrast, is poor in  
372 its chemical composition and lacks antimicrobial compounds. 1-Bromohexadecane (**1**)  
373 and 2-chlorocyclohexanol (**2**) were the only two compounds identified on the commercial  
374 trap. Both are known as halogenated compounds. Based on Globally Harmonized System  
375 of Classification and Labeling of Chemicals (GHS), both are characterized as irritant for  
376 humans, due to the fact that these compounds induce skin corrosion (category 2),  
377 respiratory tract irritation (category 3) as well as severe eye irritation (category 2A)  
378 (European Chemical Agency- ECHA, 2017). This chemical profile suggests that this  
379 commercial trap would not be innocuous for human health; nevertheless, it is

380 commercially offered as an eco-friendly option. Our results highly suggest that *H.*  
381 *platylepis* sticky exudate may be a suitable alternative for controlling synanthropic  
382 crawling insects, including cockroaches, at low cost and with additional benefits such as  
383 potential antimicrobial properties. These virtues of *H. platylepis* sticky exudate trap fit  
384 the current needs and trends in pest control, where several methodologies must be  
385 integrated in order to generate novel alternatives in consideration of human and  
386 environmental health [79]. Further research is needed in order to test this adhesive resin  
387 in other formats for insect trapping as well as to evaluate its effectiveness against other  
388 pest insects. For instance, resinous materials have been considered among the updated  
389 alternatives for controlling domiciliary termites [44].

390

## 391 **Conclusions**

392 Results here demonstrated that devil's lollypop resin is a natural source of terpenoids and  
393 flavonoids with potential applications as insecticide and antibacterial. Using UHPLC-  
394 DAD-MS we have identified 27 secondary metabolites in *H. platylepis*' resin. Most of  
395 which, as far as we know, are reported here for the first time. Many of these compounds  
396 are flavones, flavanones, phenolic acids, fatty acids, and labdane terpenoids. This  
397 chemical knowledge may be helpful for further research on *H. platylepis* and its  
398 applications in biomedicine and pest and pathogens control industry. In conclusion, this  
399 plant is a rich source of phenolic and clerodane compounds with insecticide and  
400 antibacterial activity that may be used as an effective biocontrol agent against zoonotic  
401 crawling insects and their associate microorganisms .

402

## 403 **Supporting Information**

404 **Fig. A.1:** Full HR-MS spectra and structures of compounds 3 (a), 9 (b), 10 (c), 12 (d), 14  
405 (e), 22 (f), 23 (g), 26 (h) and 27 (i).

406

## 407 **Acknowledgments**

408 We thank Catherine Cabello and Angel Olguín for help during fieldwork and laboratory  
409 work.

410

## 411 **Funding**

412 This research was funded by FONDECYT Iniciación No. 11100109 and CONICYT  
413 Inserción No. 79100013 granted to Cristian Villagra, RSG N° 21286-2 to Constanza  
414 Schapheer, Proyecto Fortalecimiento USACH USA1799-UA253010, Universidad de  
415 Santiago de Chile granted to Alejandro Urzúa, Javier Echeverria and Marcia Gonzalez,  
416 and CONICYT PAI/ACADEMIA No. 79160109 to Javier Echeverria.

417

418

## 419 **References**

- 420 1. Nicolopoulou-Stamati P, Maipas S, Kotampasi C, Stamatis P, Hens L. Chemical  
421 Pesticides and Human Health: The Urgent Need for a New Concept in Agriculture.  
422 Front Public Heal. Frontiers; 2016;4: 148. doi:10.3389/fpubh.2016.00148
- 423 2. Bernardes MFF, Pazin M, Pereira LC, Dorta DJ. Impact of Pesticides on

- 424 Environmental and Human Health. Toxicology Studies - Cells, Drugs and  
425 Environment. InTech; 2015. doi:10.5772/59710
- 426 3. Finizio A, Villa S. Environmental risk assessment for pesticides. Environ Impact  
427 Assess Rev. InTech; 2002;22: 235–248. doi:10.1016/S0195-9255(02)00002-1
- 428 4. Metcalf RL. Insect resistance to insecticides. Pestic Sci. 1989;26: 333–358.  
429 doi:10.1002/ps.2780260403
- 430 5. Hemingway J, Ranson H. Insecticide resistance in insect vectors of human disease.  
431 Annu Rev Entomol. 2000;45: 371–391. doi:10.1146/annurev.ento.45.1.371
- 432 6. Naqqash MN, Gökçe A, Bakhsh A, Salim M. Insecticide resistance and its  
433 molecular basis in urban insect pests. Parasitology Research. 2016. pp. 1363–1373.  
434 doi:10.1007/s00436-015-4898-9
- 435 7. Bonnefoy X, Kampen H, Sweeney K. Public Health Significance of Urban Pests.  
436 Public health significance of urban pests. 2008. doi:10.1016/S1473-  
437 3099(09)70222-1
- 438 8. Chavasse DC, Yap HH. Chemical Methods for the Control of Vectors and Pests of  
439 Public Health Importance. 1997. pp. 16–21.
- 440 9. Menasria T, Moussa F, El-Hamza S, Tine S, Megri R, Chenchouni H. Bacterial  
441 load of German cockroach (*Blattella germanica*) found in hospital environment.  
442 Pathog Glob Health. 2014;108: 141–7. doi:10.1179/2047773214Y.0000000136
- 443 10. Rivault C, Cloarec A, Le Guyader A. Bacterial load of cockroaches in relation to  
444 urban environment. Epidemiol Infect. 1993;110: 317–325.  
445 doi:10.1017/S0950268800068254
- 446 11. Buckingham SC. Tick-borne disease. Clinical Infectious Disease, Second Edition.

- 447 2015. pp. 797–799. doi:10.1017/CBO9781139855952.136
- 448 12. LaSala PR, Holbrook M. Tick-borne flaviviruses. *Clinics in Laboratory Medicine*.  
449 2010. pp. 221–235. doi:10.1016/j.cll.2010.01.002
- 450 13. Delaunay P, Blanc V, Del Giudice P, Levy-Bencheton A, Chosidow O, Marty P, et  
451 al. Bedbugs and infectious diseases. *Clinical Infectious Diseases*. 2011. pp. 200–  
452 210. doi:10.1093/cid/ciq102
- 453 14. Rassi A, Rassi A, Marin-Neto JA. Chagas disease. *The Lancet*. 2010. pp. 1388–  
454 1402. doi:10.1016/S0140-6736(10)60061-X
- 455 15. Cloarec A, Rivault C, Fontaine F, Le Guyader A. Cockroaches as carriers of  
456 bacteria in multi-family dwellings. *Epidemiol Infect*. 1992;109: 483–490.  
457 doi:10.1017/S0950268800050470
- 458 16. Schapheer C, Sandoval G, Villagra C. Pest Cockroaches May Overcome  
459 Environmental Restriction Due to Anthropization. *J Med Entomol*. 2018;In press.
- 460 17. Nasirian H. Infestation of cockroaches (Insecta: Blattaria) in the human dwelling  
461 environments: A systematic review and meta-analysis. *Acta Tropica*. 2017. pp. 86–  
462 98. doi:10.1016/j.actatropica.2016.12.019
- 463 18. Kassiri H, Kassiri A, Kazemi S. Investigation on American cockroaches medically  
464 important bacteria in Khorramshahr hospital, Iran. *Asian Pacific J Trop Dis*.  
465 2014;4: 201–203. doi:10.1016/S2222-1808(14)60505-3
- 466 19. Fakoorziba MR, Shahriari-Namadi M, Moemenbellah-Fard MD, Hatam GR, Azizi  
467 K, Amin M, et al. Antibiotics susceptibility patterns of bacteria isolated from  
468 American and German cockroaches as potential vectors of microbial pathogens in  
469 hospitals. *Asian Pacific J Trop Dis*. Elsevier; 2014;4: S790–S794.



- 470 20. Arruda LK, Ferriani VPL, Vailes LD, Pomés A, Chapman MD. Cockroach  
471 allergens: environmental distribution and relationship to disease. *Curr Allergy*  
472 *Asthma Rep. Springer*; 2001;1: 466–473.
- 473 21. Burgess NR, McDermott SN, Whiting J. Aerobic bacteria occurring in the hind-gut  
474 of the cockroach, *Blatta orientalis*. *J Hyg (Lond)*. 1973;71: 1–7.  
475 doi:10.1017/S0022172400046155
- 476 22. Arruda LK, Vailes LD, Ferriani VPL, Santos ABR, Pomés A, Chapman MD.  
477 Cockroach allergens and asthma. *Journal of Allergy and Clinical Immunology*.  
478 2001. pp. 419–428. doi:10.1067/mai.2001.112854
- 479 23. Wooster MT, Ross MH. Sublethal responses of the German cockroach to vapors of  
480 commercial pesticide formulations. *Entomol Exp Appl. Wiley Online Library*;  
481 1989;52: 49–55.
- 482 24. Chew GL, Burge HA, Dockery DW, Muilenberg ML, Weiss ST, Gold DR.  
483 Limitations of a home characteristics questionnaire as a predictor of indoor  
484 allergen levels. *Am J Respir Crit Care Med. Am Thoracic Soc*; 1998;157: 1536–  
485 1541.
- 486 25. Zhang YC, Perzanowski MS, Chew GL. Sub-lethal exposure of cockroaches to  
487 boric acid pesticide contributes to increased Bla g 2 excretion. *Allergy. Wiley*  
488 *Online Library*; 2005;60: 965–968.
- 489 26. Pomés A, Arruda LK. Investigating cockroach allergens: aiming to improve  
490 diagnosis and treatment of cockroach allergic patients. *Methods. Elsevier*;  
491 2014;66: 75–85.
- 492 27. Pai HH, Chen WC, Peng CF. Isolation of bacteria with antibiotic resistance from

- 493 household cockroaches (*Periplaneta americana* and *Blattella germanica*). *Acta*  
494 *Trop.* 2005;93: 259–265. doi:10.1016/j.actatropica.2004.11.006
- 495 28. Bouamama L, Sorlozano A, Laglaoui A, Lebbadi M, Aarab A, Gutierrez J.  
496 Antibiotic resistance patterns of bacterial strains isolated from *Periplaneta*  
497 *americana* and *Musca domestica* in Tangier, Morocco. *J Infect Dev Ctries.* 2010;4:  
498 194–201.
- 499 29. Moges F, Eshetie S, Endris M, Huruy K, Muluye D, Feleke T, et al. Cockroaches  
500 as a Source of High Bacterial Pathogens with Multidrug Resistant Strains in  
501 Gondar Town, Ethiopia. *Biomed Res Int.* 2016;2016. doi:10.1155/2016/2825056
- 502 30. Tilahun B, Worku B, Tachbele E, Terefe S, Kloos H, Legesse W. High load of  
503 multi-drug resistant nosocomial neonatal pathogens carried by cockroaches in a  
504 neonatal intensive care unit at Tikur Anbessa specialized hospital, Addis Ababa,  
505 Ethiopia. *Antimicrob Resist Infect Control.* 2012;1. doi:10.1186/2047-2994-1-12
- 506 31. Quarles W. IPM reduces pesticides, cockroaches, and asthma. *IPM Pract.* 2009;31:  
507 8.
- 508 32. Schal C, Hamilton R. Integrated suppression of synanthropic cockroaches. *Annu*  
509 *Rev Entomol.* 1990;35: 521–551.
- 510 33. Ferrero A, Sánchez Chopa C, Werdin González J, Alzogaray R. Repellence and  
511 toxicity of *Schinus molle* extracts on *Blattella germanica*. *Fitoterapia.* 2007;78:  
512 311–314. doi:10.1016/j.fitote.2006.11.021
- 513 34. Sánchez Chopa C, Alzogaray R, Ferrero A. Repellency Assays with *Schinus molle*  
514 *var. areira* (L.) (Anacardiaceae) Essential Oils against *Blattella germanica* L.  
515 (Blattodea : Blattellidae). *BioAssay.* 2006;1: 1–3.

- 516 35. Yoon C, Kang S-H, Yang J-O, Noh D-J, Indiragandhi P, Kim G-H. Repellent  
517 activity of citrus oils against the cockroaches *Blattella germanica*, *Periplaneta*  
518 *americana* and *P. fuliginosa*. *J Pestic Sci.* 2009;34: 77–88.  
519 doi:10.1584/jpestics.G07-30
- 520 36. Castella G, Chapuisat M, Moret Y, Christe P. The presence of conifer resin  
521 decreases the use of the immune system in wood ants. *Ecol Entomol.* 2008;33:  
522 408–412. doi:10.1111/j.1365-2311.2007.00983.x
- 523 37. Shuaib M, Ali A, Ali M, Panda B, Ahmad M. Antibacterial activity of resin rich  
524 plant extracts. *J Pharm Bioallied Sci.* 2013;5: 265. doi:10.4103/0975-7406.120073
- 525 38. Urzúa A, Jara F, Tojo E, Wilkens M, Mendoza L, Rezende MC. A new  
526 antibacterial clerodane diterpenoid from the resinous exudate of *Haplopappus*  
527 *uncinatus*. *J Ethnopharmacol.* 2006;103: 297–301.
- 528 39. Lam J, Sutton P, Kalkbrenner A, Windham G, Halladay A, Koustas E, et al. A  
529 systematic review and meta-analysis of multiple airborne pollutants and autism  
530 spectrum disorder. *PLoS One.* 2016;11. doi:10.1371/journal.pone.0161851
- 531 40. Hewitt AJ. Drift filtration by natural and artificial collectors: A literature review.  
532 Macon, MO, USA.; 2001.
- 533 41. Smith LM, Appel AG. Comparison of several traps for catching German  
534 cockroaches (Dictyoptera: Blattellidae) under laboratory conditions. *J Econ*  
535 *Entomol. BioOne;* 2008;101: 151–158.
- 536 42. Nalyanya G, Gore JC, Linker HM, Schal C. German cockroach allergen levels in  
537 North Carolina schools: comparison of integrated pest management and  
538 conventional cockroach control. *J Med Entomol.* 2014;46: 420–427.

- 539 43. Barzman M, Bàrberi P, Birch ANE, Boonekamp P, Dachbrodt-Saaydeh S, Graf B,  
540 et al. Eight principles of integrated pest management. *Agronomy for Sustainable*  
541 *Development*. 2015. pp. 1199–1215. doi:10.1007/s13593-015-0327-9
- 542 44. Verma M, Sharma S, Prasad R. Biological alternatives for termite control: A  
543 review. *International Biodeterioration and Biodegradation*. 2009. pp. 959–972.  
544 doi:10.1016/j.ibiod.2009.05.009
- 545 45. Villagra CA, Meza AA, Urzúa A. Differences in arthropods found in flowers  
546 versus trapped in plant resins on *Haplopappus platylepis* Phil. (Asteraceae): Can  
547 the plant discriminate between pollinators and herbivores? *Arthropod Plant*  
548 *Interact*. 2014;8: 411–419. doi:10.1007/s11829-014-9328-x
- 549 46. Urzúa A. Secondary Metabolites in the Epicuticle of *Haplopappus Foliosus* D.C.  
550 (Asteraceae). *J Chil Chem Soc*. 2004;49: 137–141. doi:10.4067/S0717-  
551 97072004000200006
- 552 47. Urzúa A, Andrade L. Comparative chemical composition of the resinous exudates  
553 from *Haplopappus foliosus* and *H. uncinatus*. *Biochem Syst Ecol*. 2000;28: 491–  
554 493.
- 555 48. Vargas HA, Rasmann S, Ramirez-Verdugo P, Villagra CA. *Lioptilodes friasi*  
556 (Lepidoptera: Pterophoridae) Niche Breadth in the Chilean Mediterranean  
557 Matorral Biome: Trophic and Altitudinal Dimensions. *Neotrop Entomol*. 2017;47.  
558 doi:10.1007/s13744-017-0514-2
- 559 49. Klingenberg L. Monographie der südamerikanischen Gattungen *Haplopappus*  
560 *Cass.* Und *Notopappus* L. Klingenberg (Asteraceae-Astereae). Berlin: Series  
561 *Bibliotheca Botanica*, Heft 157 0067- 7892, Schweizerbartsche

- 562           Verlagsbuchhandlung; 2007. p. 331.
- 563   50.    Urzúa A. Secondary metabolites in the epicuticle of *Haplopappus foliosus* DC.  
564           (Asteraceae). *J Chil Chem Soc.* 2004;49: 137–141. doi:10.4067/S0717-  
565           97072004000200006
- 566   51.    Camousseight A. Baratas o cucarachas. In: Canals M, Cattán P, editors. *Zoología*  
567           Médica II: Invertebrados. Primera. Editorial Universitaria; 2008. p. 392.
- 568   52.    Hammer O. PAST Reference manual. Natural History Museum. 1999.
- 569   53.    Richardson J. The analysis of 2 x 2 contingency tables - Yet again. *Stat Med.*  
570           2011;30: 890.
- 571   54.    Simirgiotis MJ, Quispe C, Bórquez J, Schmeda-Hirschmann G, Avendaño M,  
572           Sepúlveda B, et al. Fast high resolution Orbitrap MS fingerprinting of the resin of  
573           *Heliotropium taltalense* Phil. from the Atacama Desert. *Ind Crops Prod.* Elsevier;  
574           2016;85: 159–166.
- 575   55.    Adams RP. Identification of Essential Oil Components by Gas  
576           Chromatography/Mass Spectroscopy. 4th ed. Stream C, editor. Allured Publishing  
577           Corporation; 2007.
- 578   56.    Korovetska H, Novák O, Turečková V, Hájíčková M, Gloser V. Signalling  
579           mechanisms involved in the response of two varieties of *Humulus lupulus* L. to  
580           soil drying: II. changes in the concentration of abscisic acid catabolites and stress-  
581           induced phytohormones. *Plant Growth Regul.* Springer; 2016;78: 13–20.
- 582   57.    Kapp K, Hakala E, Orav A, Pohjala L, Vuorela P, Püssa T, et al. Commercial  
583           peppermint (*Mentha× piperita* L.) teas: Antichlamydial effect and polyphenolic  
584           composition. *Food Res Int.* Elsevier; 2013;53: 758–766.

- 585 58. Jiménez-Sánchez C, Lozano-Sánchez J, Rodríguez-Pérez C, Segura-Carretero A,  
586 Fernández-Gutiérrez A. Comprehensive, untargeted, and qualitative RP-HPLC-  
587 ESI-QTOF/MS2 metabolite profiling of green asparagus (*Asparagus officinalis*). J  
588 Food Compos Anal. Elsevier; 2016;46: 78–87.
- 589 59. Simirgiotis MJ, Ramirez JE, Hirschmann GS, Kennelly EJ. Bioactive coumarins  
590 and HPLC-PDA-ESI-ToF-MS metabolic profiling of edible queule fruits  
591 (*Gomortega keule*), an endangered endemic Chilean species. Food Res Int.  
592 Elsevier; 2013;54: 532–543.
- 593 60. Doménech-Carbó MT, de La Cruz-Cañizares J, Osete-Cortina L, Doménech-Carbó  
594 A, David H. Ageing behaviour and analytical characterization of the Jatobá resin  
595 collected from *Hymenaea stigonocarpa* Mart. Int J Mass Spectrom. Elsevier;  
596 2009;284: 81–92.
- 597 61. De Gutierrez AN, Catalan CAN, Díaz JG, Herz W. Sesquiterpene lactones and  
598 other constituents of *Stevia jujuyensis*. Phytochemistry. Elsevier; 1992;31: 1818–  
599 1820.
- 600 62. Urzúa A, Echeverría J, Espinoza J. Lipophilicity and antibacterial activity of  
601 flavonols: Antibacterial activity of resinous exudates of *haplopappus litoralis*, *H.*  
602 *chrysantemifolius* and *H. scrobiculatus* | Lipofilia y actividad antibacteriana de  
603 flavonoles: Actividad antibacteriana de los ex. Bol Latinoam y del Caribe Plantas  
604 Med y Aromat. 2012;
- 605 63. Cushnie TPT, Lamb AJ. Recent advances in understanding the antibacterial  
606 properties of flavonoids. Int J Antimicrob Agents. Elsevier; 2011;38: 99–107.
- 607 64. Echeverría J, Urzúa A, Sanhueza L, Wilkens M. Enhanced Antibacterial Activity

- 608 of Ent-Labdane Derivatives of Salvic Acid (7 $\alpha$ -Hydroxy-8(17)-ent-Labden-15-Oic  
609 Acid): Effect of Lipophilicity and the Hydrogen Bonding Role in Bacterial  
610 Membrane Interaction. *Molecules*. 2017; doi:10.3390/molecules22071039
- 611 65. Echeverría J, Opazo J, Mendoza L, Urzúa A, Wilkens M. Structure-Activity and  
612 Lipophilicity Relationships of Selected Antibacterial Natural Flavones and  
613 Flavanones of Chilean Flora. *Molecules*. 2017; doi:10.3390/molecules22040608
- 614 66. Echeverría J, González-Teuber M, Urzúa A. Antifungal activity against *Botrytis*  
615 *cinerea* of labdane-type diterpenoids isolated from the resinous exudate of  
616 *Haplopappus velutinus* Remy (Asteraceae). *Nat Prod Res*. 2018; 1–5.  
617 doi:10.1080/14786419.2018.1443093
- 618 67. Chinou I. Labdanes of natural origin-biological activities (1981-2004). *Curr Med*  
619 *Chem*. Bentham Science Publishers; 2005;12: 1295–1317.
- 620 68. Singh M, Pal M, Sharma RP. Biological activity of the labdane diterpenes. *Planta*  
621 *Med*. Georg Thieme Verlag Stuttgart· New York; 1999;65: 2–8.
- 622 69. Santos AO dos, Izumi E, Ueda-Nakamura T, Dias-Filho BP, Veiga-Júnior VF da,  
623 Nakamura CV. Antileishmanial activity of diterpene acids in copaiba oil. *Mem*  
624 *Inst Oswaldo Cruz*. *SciELO Brasil*; 2013;108: 59–64.
- 625 70. Dostálová A, Volf P. Leishmania development in sand flies: parasite-vector  
626 interactions overview. *Parasit Vectors*. 2012;5: 276. doi:10.1186/1756-3305-5-276
- 627 71. Prost I, Dhondt S, Rothe G, Vicente J, Rodriguez MJ, Kift N, et al. Evaluation of  
628 the antimicrobial activities of plant oxylipins supports their involvement in defense  
629 against pathogens. *Plant Physiol*. *Am Soc Plant Biol*; 2005;139: 1902–1913.
- 630 72. Desbois AP, Smith VJ. Antibacterial free fatty acids: activities, mechanisms of

- 631 action and biotechnological potential. *Appl Microbiol Biotechnol*. Springer;  
632 2010;85: 1629–1642.
- 633 73. Martin-Arjol I, Bassas-Galia M, Bermudo E, Garcia F, Manresa A. Identification  
634 of oxylipins with antifungal activity by LC–MS/MS from the supernatant of  
635 *Pseudomonas* 42A2. *Chem Phys Lipids*. Elsevier; 2010;163: 341–346.
- 636 74. Desbois AP, Lawlor KC. Antibacterial activity of long-chain polyunsaturated fatty  
637 acids against *Propionibacterium acnes* and *Staphylococcus aureus*. *Mar Drugs*.  
638 Multidisciplinary Digital Publishing Institute; 2013;11: 4544–4557.
- 639 75. Trapp MA, Kai M, Mithöfer A, Rodrigues-Filho E. Antibiotic oxylipins from  
640 *Alternanthera brasiliana* and its endophytic bacteria. *Phytochemistry*. Elsevier;  
641 2015;110: 72–82.
- 642 76. Clem RJ, Passarelli AL. Baculoviruses: Sophisticated Pathogens of Insects. *PLoS*  
643 *Pathog*. 2013;9. doi:10.1371/journal.ppat.1003729
- 644 77. Kazda J. The chronology of mycobacteria and the development of mycobacterial  
645 ecology. *The ecology of Mycobacteria: impact on animal’s and human’s health*.  
646 Springer; 2009. pp. 1–11.
- 647 78. Frishman AM, Alcamo IE. Domestic cockroaches and human bacterial disease.  
648 *Pest Control*. 1977;45: 16–46.
- 649 79. Roni M, Murugan K, Panneerselvam C, Subramaniam J, Nicoletti M,  
650 Madhiyazhagan P, et al. Characterization and biotoxicity of *Hypnea musciformis*-  
651 synthesized silver nanoparticles as potential eco-friendly control tool against  
652 *Aedes aegypti* and *Plutella xylostella*. *Ecotoxicol Environ Saf*. 2015;121: 31–38.  
653 doi:10.1016/j.ecoenv.2015.07.005



*Haplopappus platylepis* resin for pest control

654

655

656

657

658

*Haplopappus platylepis* resin for pest control

660

*Haplopappus platylepis* resin for pest control

662

**A**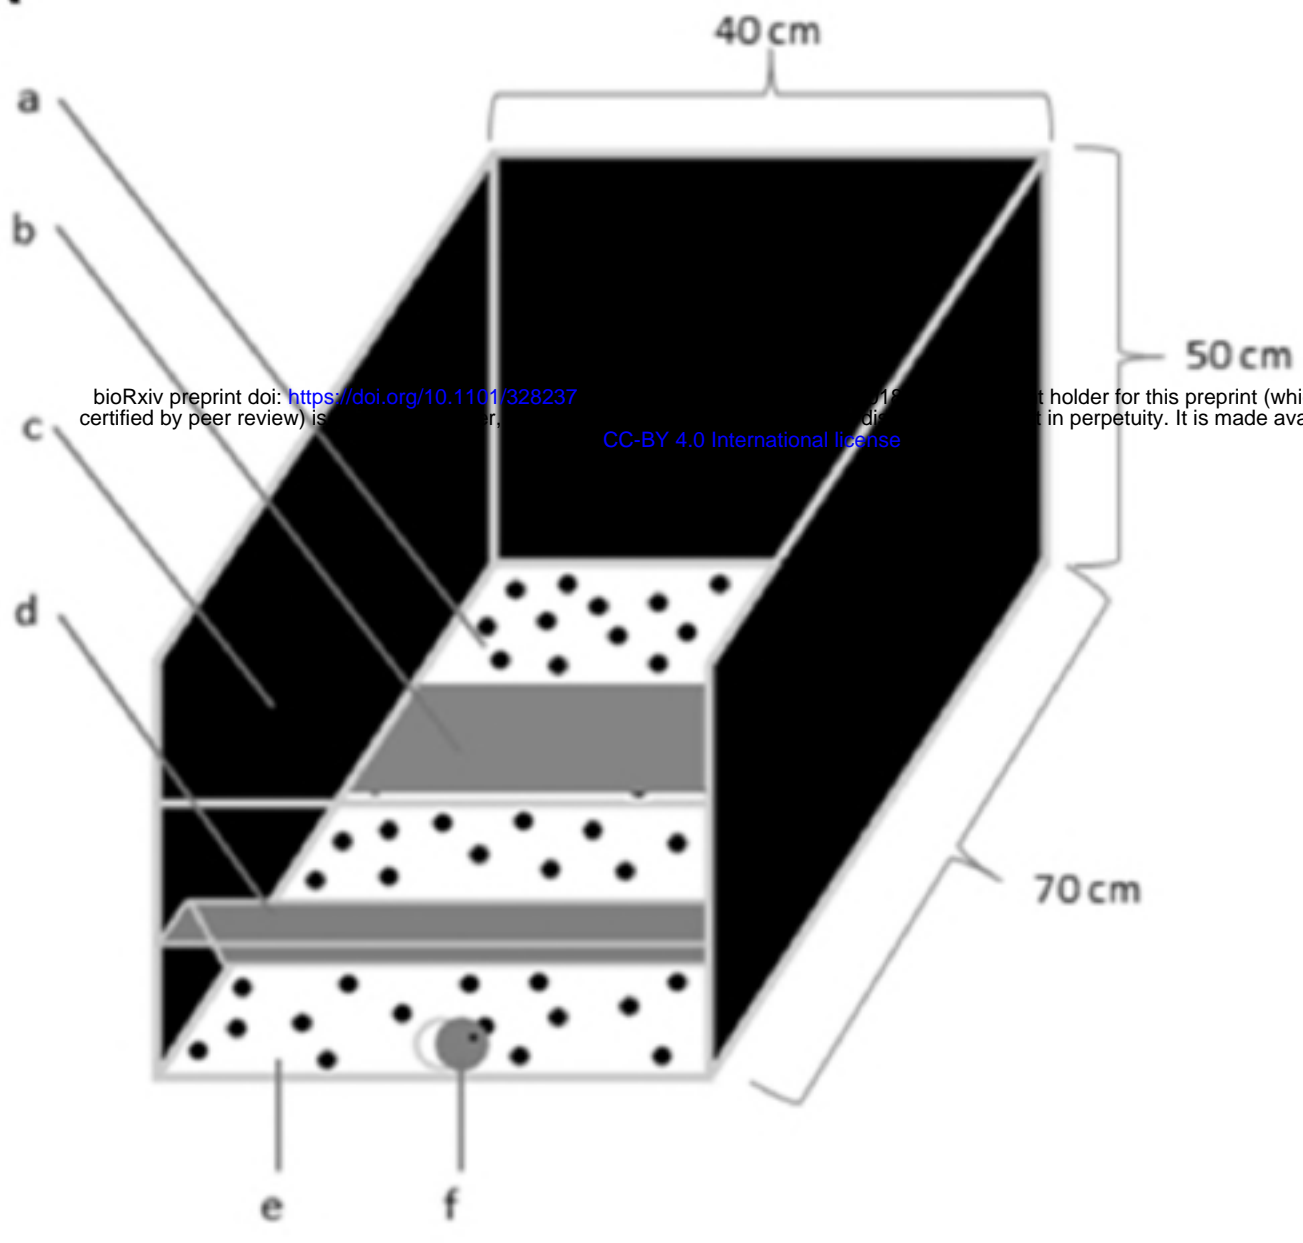**B**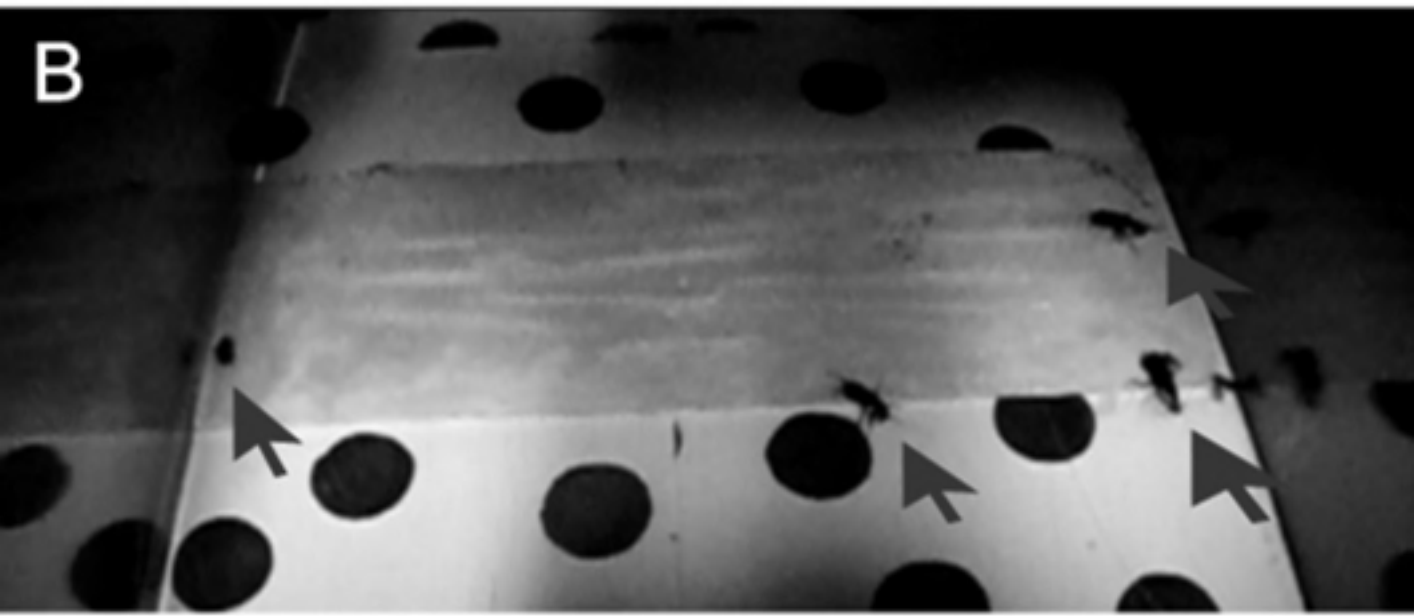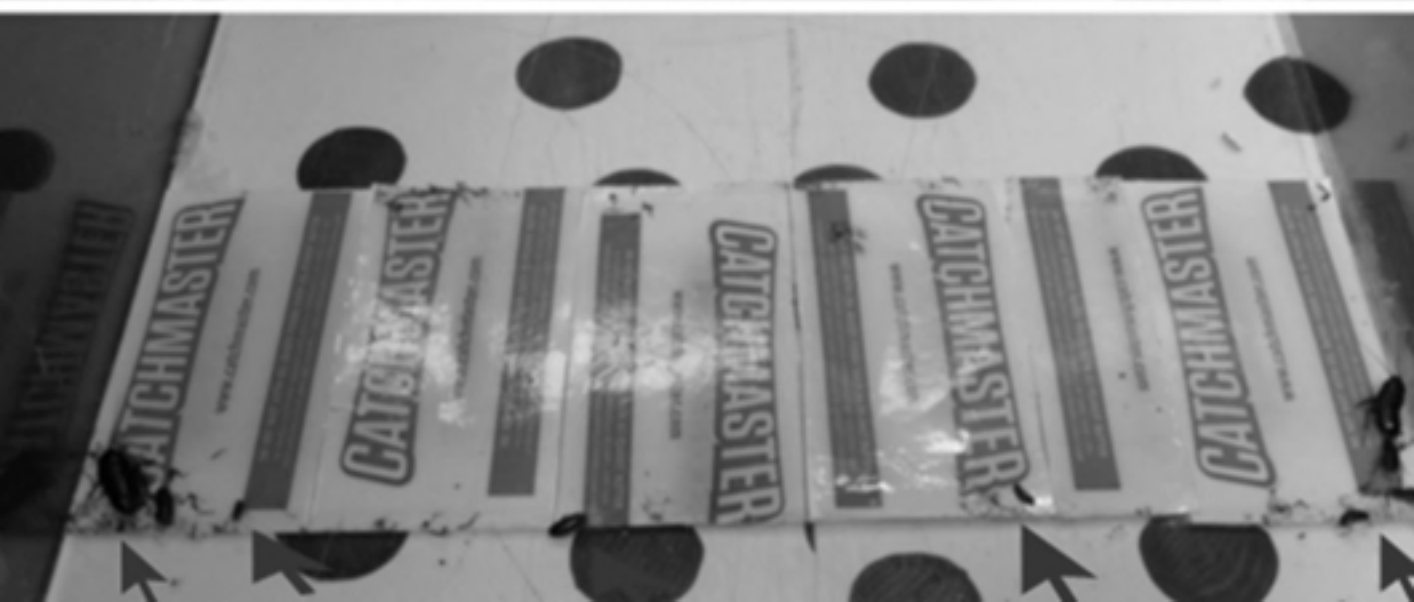

**A**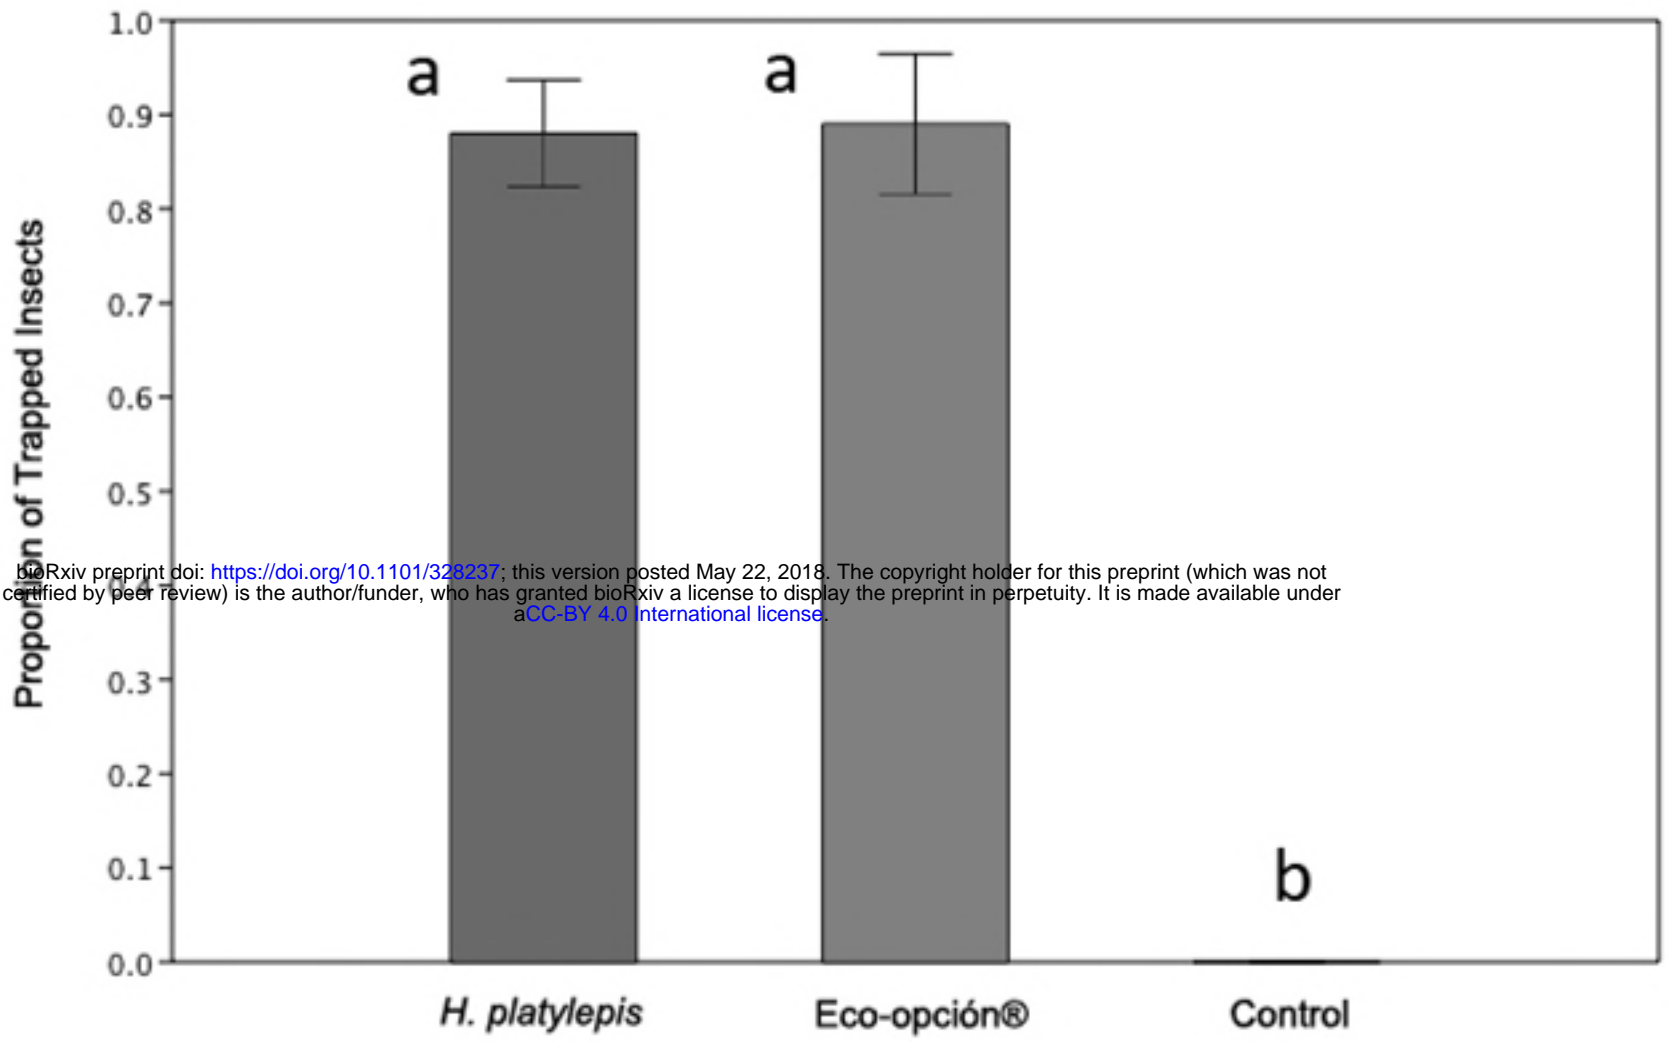**B**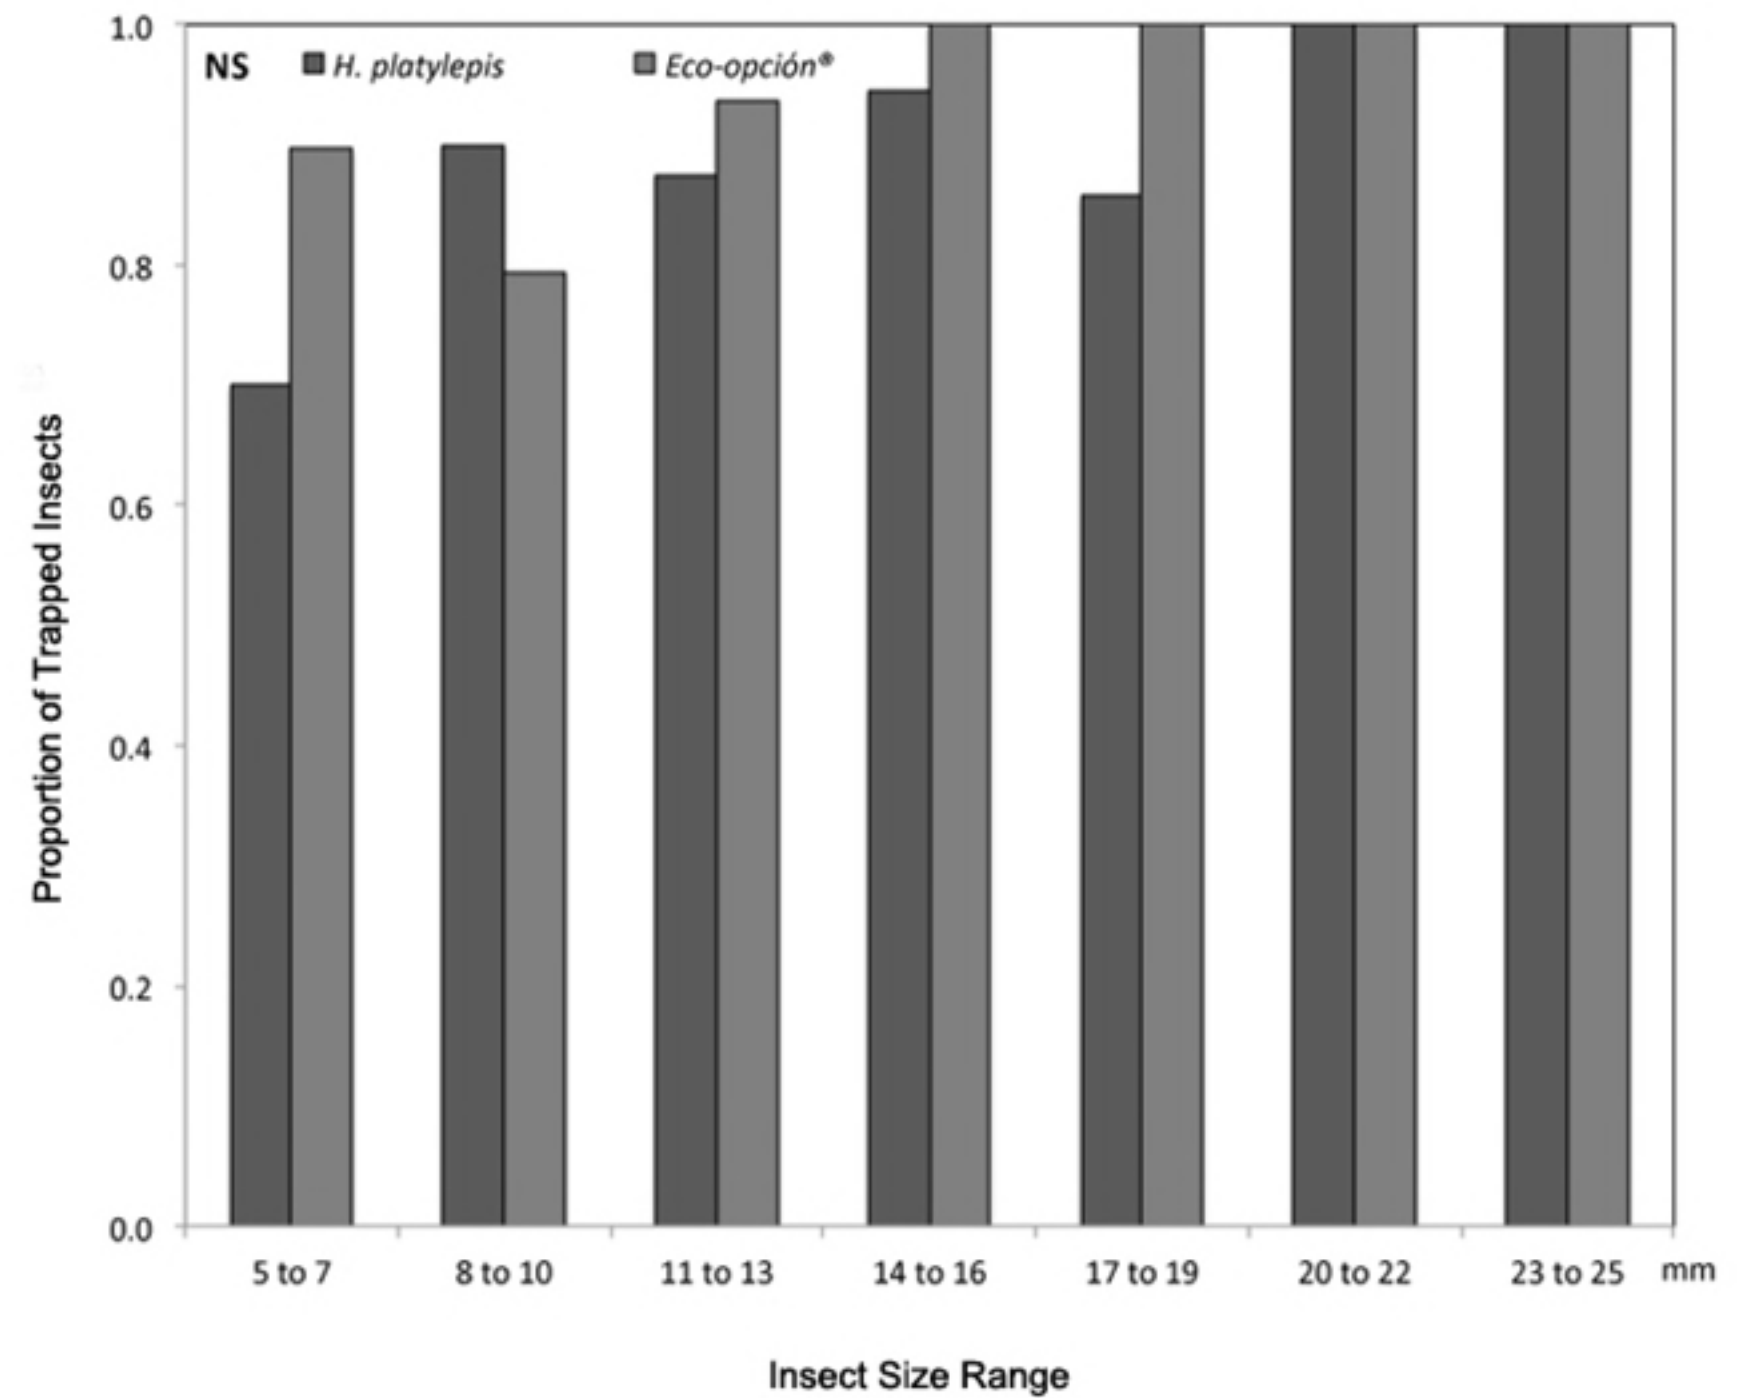

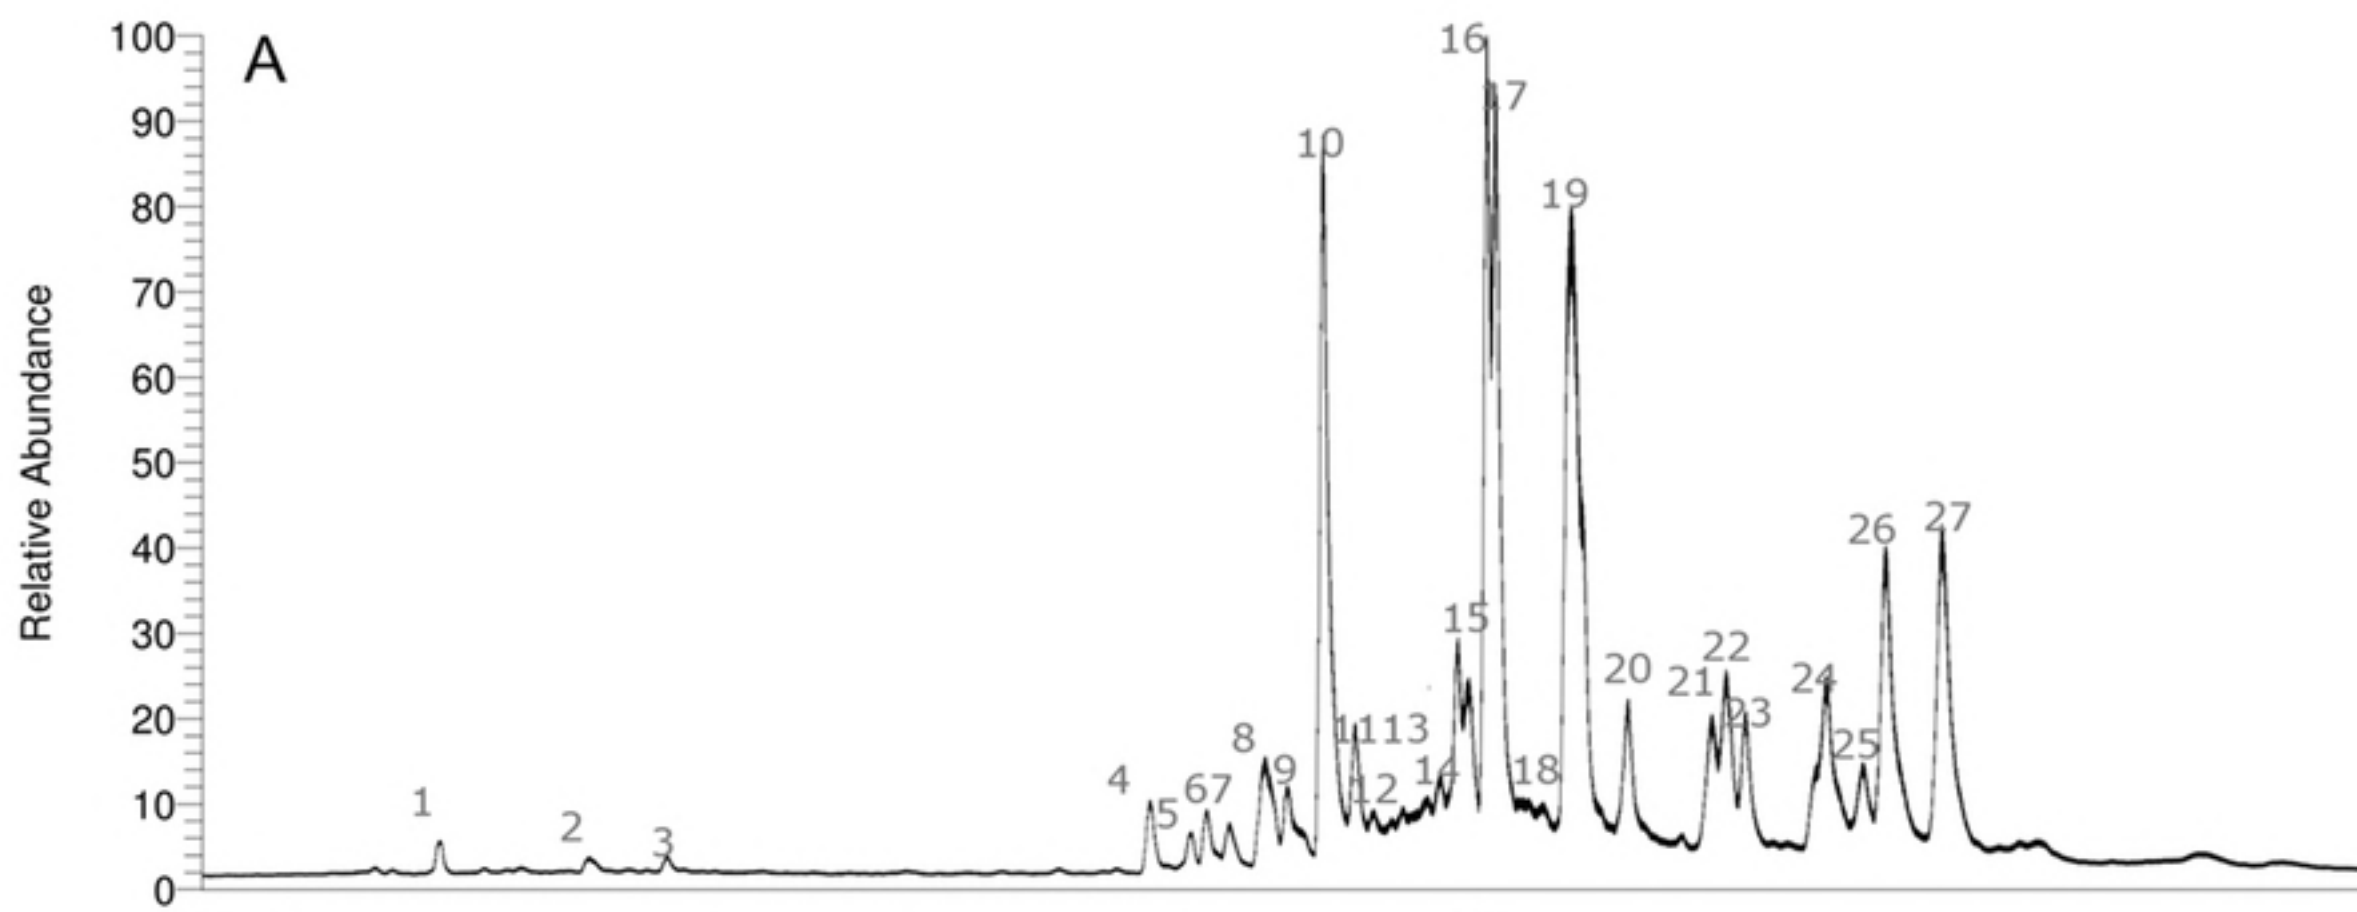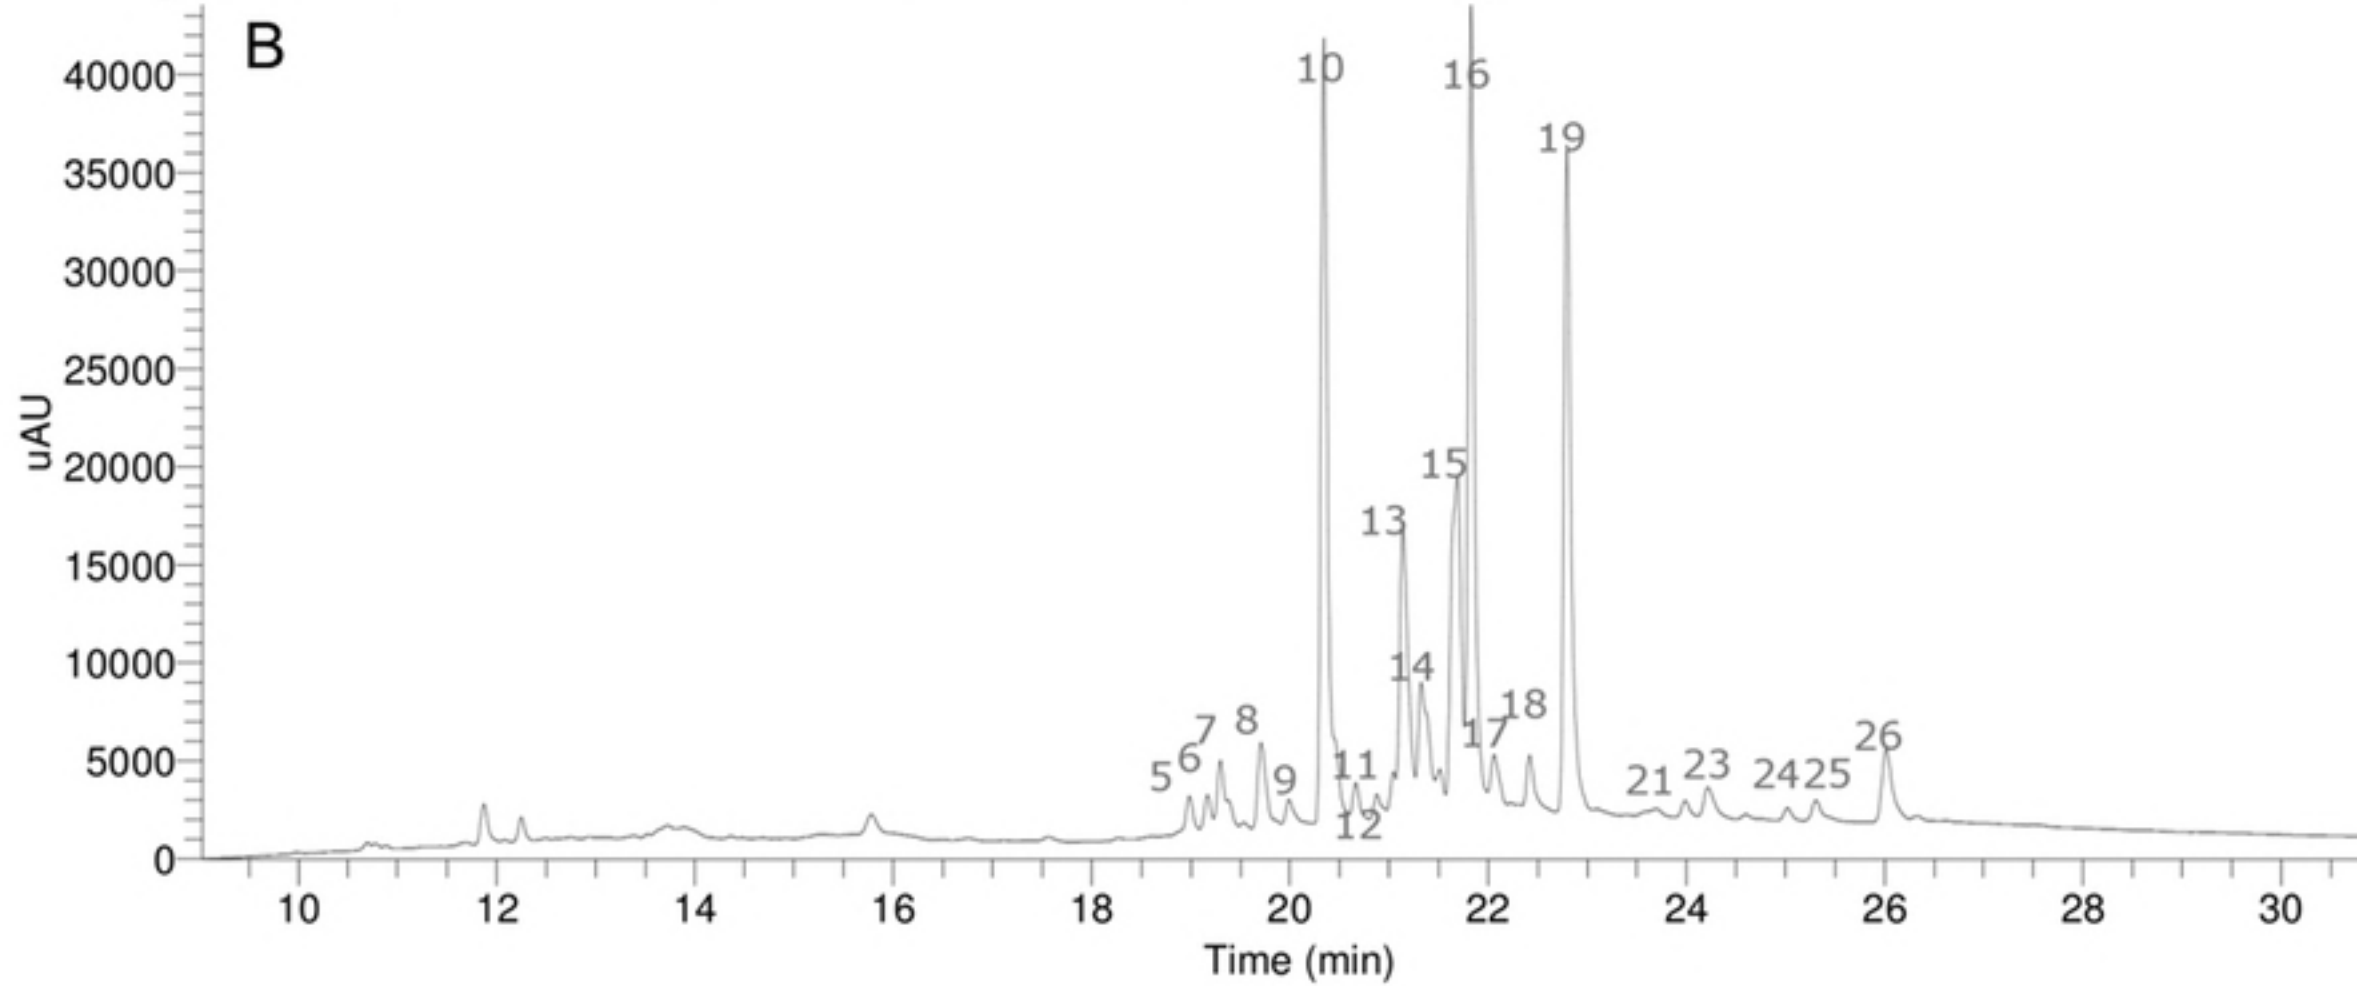

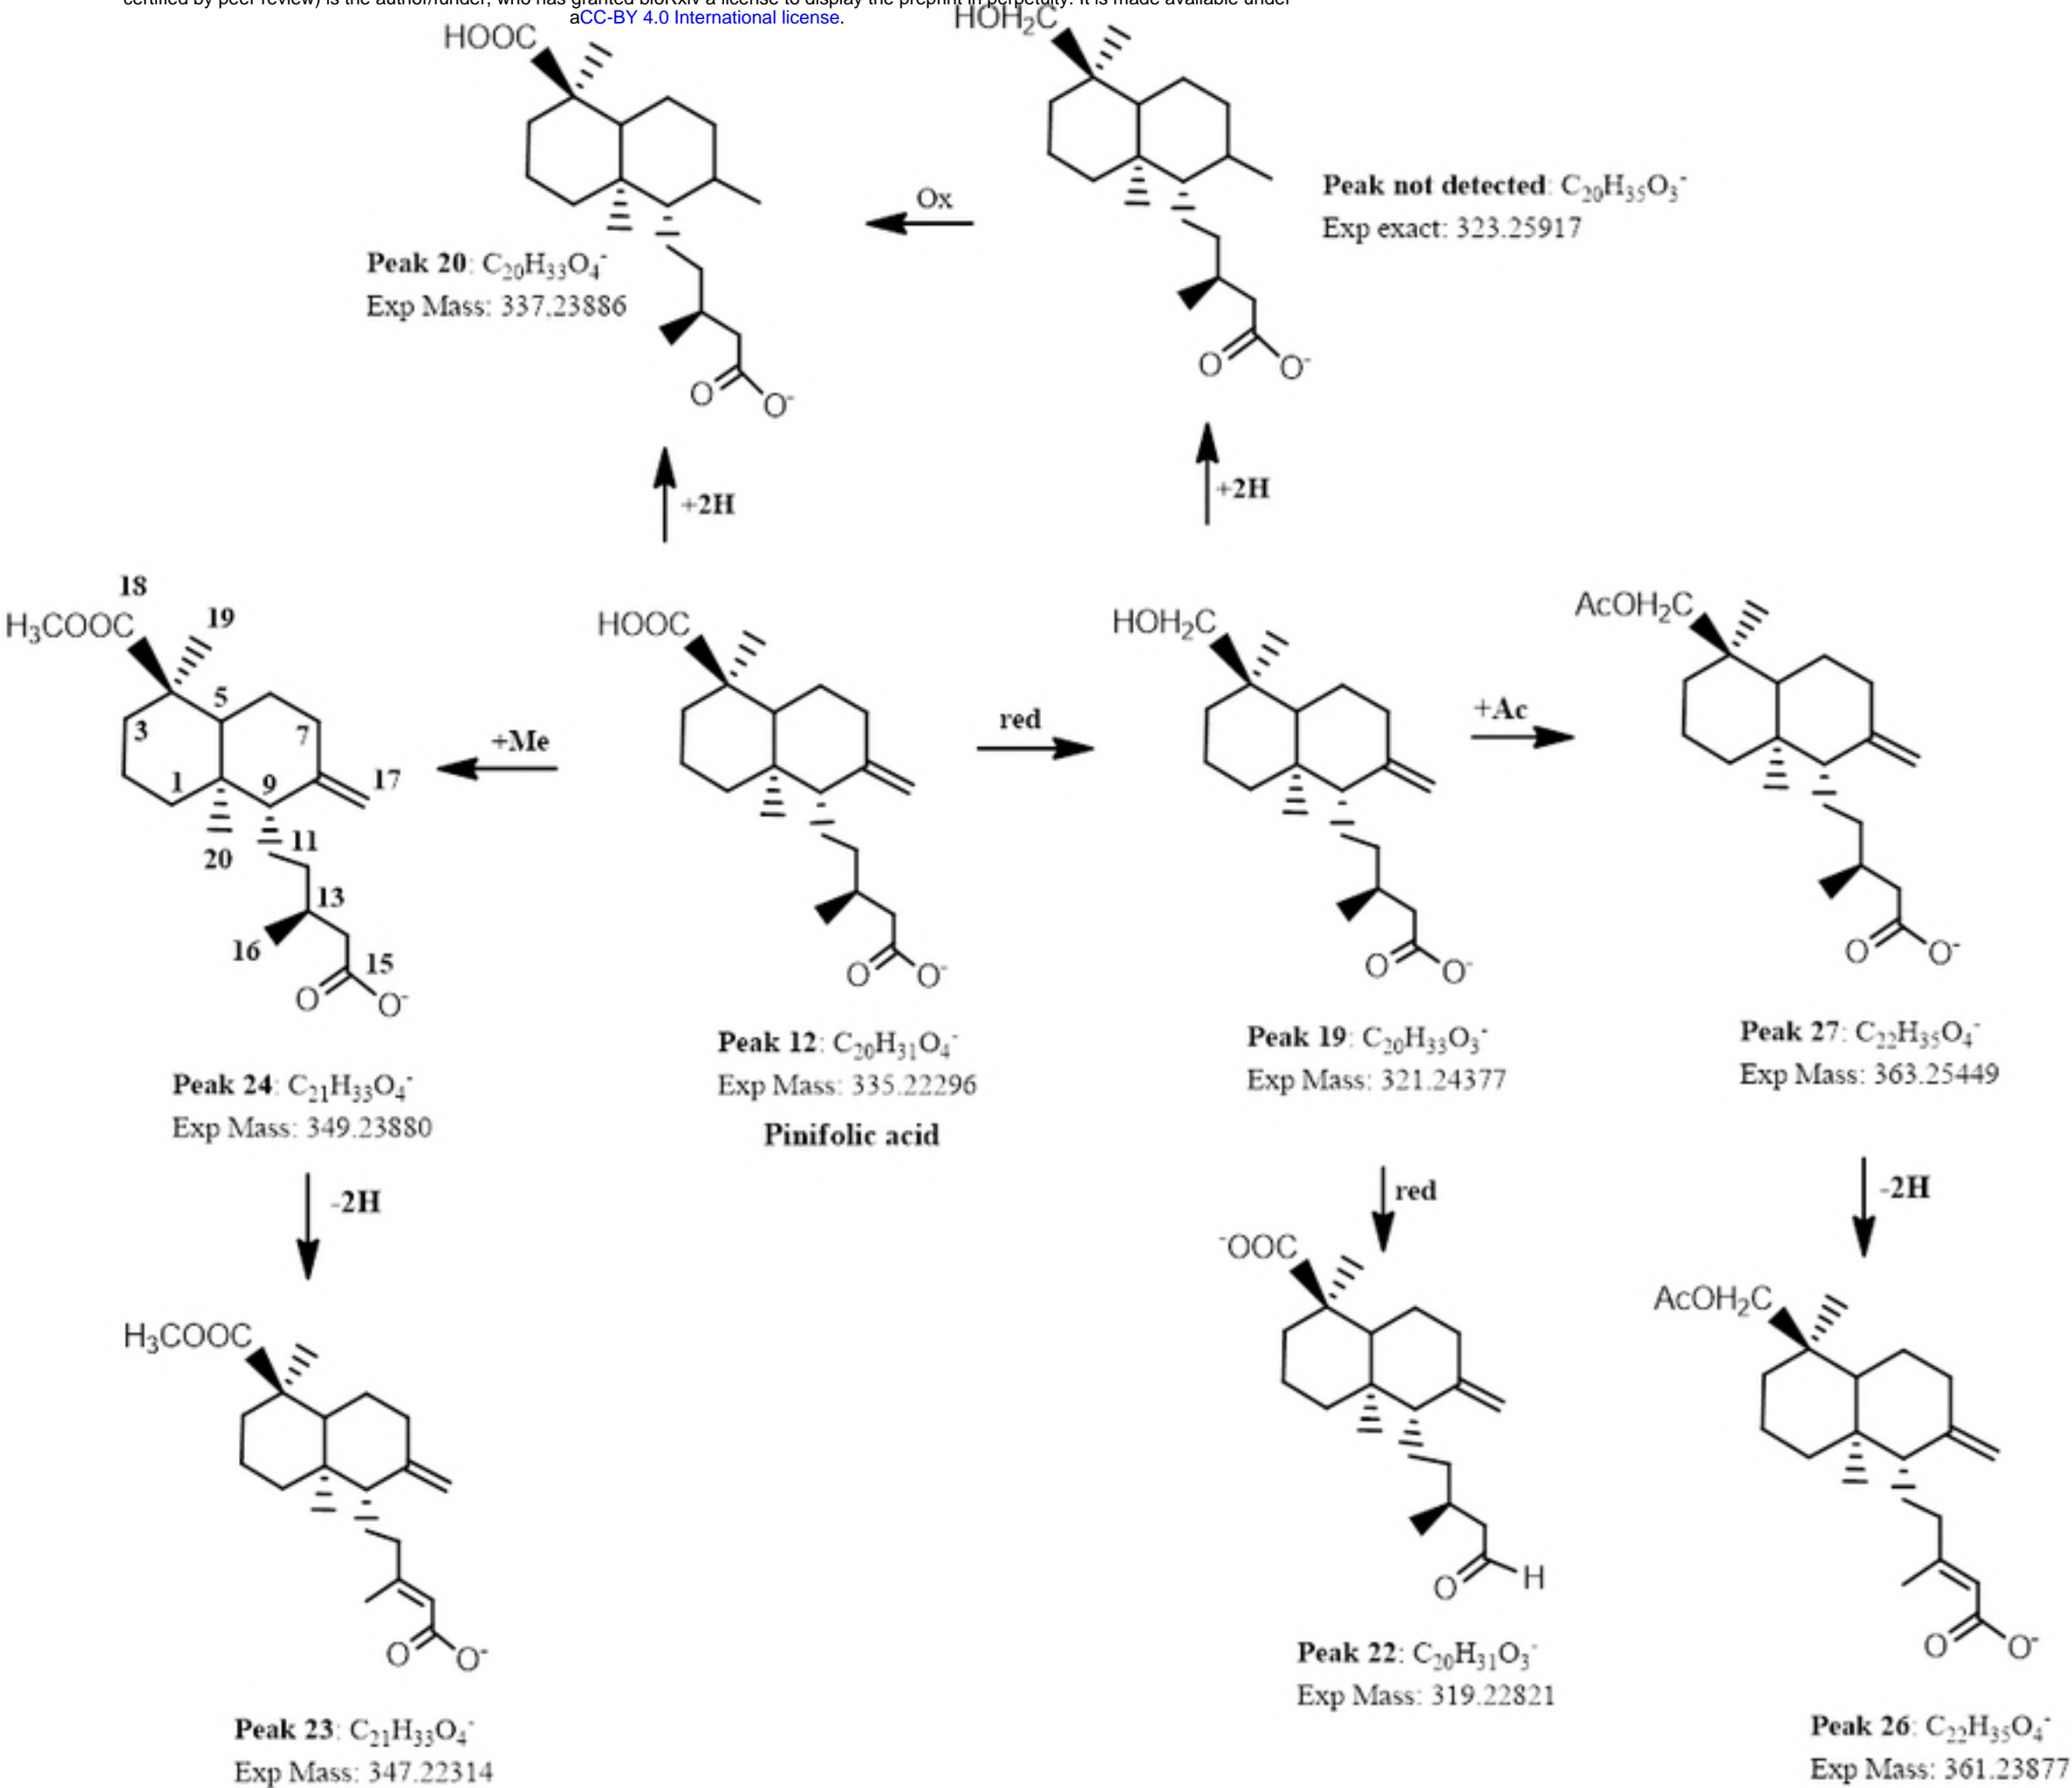

Source: https://www.biorxiv.org/content/10.1101/328237v1.full.pdf
